# Supplementary material for: Intrinsic dynamic and static nature of each HB in the multi-HBs between nucleobase pairs and its behavior, elucidated with QTAIM dual functional analysis and QC calculations
Source: Royal Society of Chemistry journal article supplement (doi:10.1039/d0ra01357a), 2020-01-01
Supplement: d0ra01357a1.pdf [file d0ra01357a1.pdf]

## Electronic Supplementary Information

### **Intrinsic Dynamic and Static Nature of Each HB in the Multi-HBs between Nucleobase Pairs and its Behavior, Elucidated with QTAIM Dual Functional Analysis and QC Calculations**

Waro Nakanishi\*, Satoko Hayashi\* and Taro Nishide

*Faculty of Systems Engineering, Wakayama University, 930 Sakaedani, Wakayama 640-8510, Japan.*

*E-mail: nakanisi@sys.wakayama-u.ac.jp, hayashi3@sys.wakayama-u.ac.jp*

| <b>Table of Contents</b>                                                                              | <b>Pages</b> |
|-------------------------------------------------------------------------------------------------------|--------------|
| Additional figures and tables                                                                         | S2–S21       |
| Computation information and geometries of compounds                                                   | S22–S32      |
| <b>Appendix</b>                                                                                       |              |
| Survey of QTAIM, closely related to QTAIM dual functional analysis                                    | S33–S35      |
| Criteria for classification of interactions: behavior of typical interactions elucidated by QTAIM-DFA | S36          |
| Characterization of interactions                                                                      | S36–S38      |
| References                                                                                            | S39          |

**Table S1.** The interaction for multi-HB in Nu-Nu' distances  $r_o(X, Y)$ , evaluated with various methods.

| AH*-B in Nu-Nu'<br>(Symmetry: No)           | $r_o(X, Y)$ (Å)<br>MP2/BSS-A' <sup>a</sup> | $r_o(X, Y)$ (Å)<br>MP2/BSS-B'a <sup>b</sup> | $r_o(X, Y)$ (Å)<br>MP2/BSS-B'b <sup>c</sup> | $r_o(X, Y)$ (Å)<br>M06-2X/BSS-A' <sup>d</sup> | $r_o(X, Y)$ (Å)<br>M06-2X/BSS-C' <sup>e</sup> | $r_o(X, Y)$ (Å)<br>M06-2X/BSS-D' <sup>f</sup> |
|---------------------------------------------|--------------------------------------------|---------------------------------------------|---------------------------------------------|-----------------------------------------------|-----------------------------------------------|-----------------------------------------------|
| N*-HN in A-T (C <sub>1</sub> : <b>1</b> )   | 1.7602                                     | 1.7527                                      | 1.7493                                      | 1.7775                                        | 1.7792                                        | 1.7765                                        |
| NH*-O in A-T (C <sub>1</sub> : <b>2</b> )   | 1.8932                                     | 1.8861                                      | 1.8770                                      | 1.9343                                        | 1.9384                                        | 1.9372                                        |
| CH*-O in A-T (C <sub>1</sub> : <b>3</b> )   | 2.7316                                     | 2.7138                                      | 2.7129                                      | 2.7452                                        | 2.7443                                        | 2.7441                                        |
| NH*-N in A-T (C <sub>s</sub> : <b>4</b> )   | 1.7602                                     | 1.7527                                      | 1.7493                                      | 1.7741                                        | 1.7759                                        | 1.7736                                        |
| NH*-O in A-T (C <sub>s</sub> : <b>5</b> )   | 1.8932                                     | 1.8861                                      | 1.8770                                      | 1.9367                                        | 1.9402                                        | 1.9382                                        |
| CH*-O in A-T (C <sub>s</sub> : <b>6</b> )   | 2.7316                                     | 2.7138                                      | 2.7130                                      | 2.7357                                        | 2.7359                                        | 2.7376                                        |
| NH*-O in C-G (C <sub>1</sub> : <b>7</b> )   | 1.7189                                     | 1.7104                                      | 1.7041                                      | 1.7490                                        | 1.7616                                        | 1.7625                                        |
| N*-HN in C-G (C <sub>1</sub> : <b>8</b> )   | 1.8706                                     | 1.8677                                      | 1.8643                                      | 1.9020                                        | 1.9103                                        | 1.9073                                        |
| O*-HN in C-G (C <sub>1</sub> : <b>9</b> )   | 1.8780                                     | 1.8687                                      | 1.8614                                      | 1.9017                                        | 1.9066                                        | 1.9102                                        |
| NH*-N in A-A (C <sub>1</sub> : <b>10</b> )  | 1.9814                                     | 1.9722                                      | 1.9664                                      | 2.0308                                        | 2.0368                                        | 2.0347                                        |
| CH*-N in A-A (C <sub>1</sub> : <b>11</b> )  | 2.4555                                     | 2.4455                                      | 2.4412                                      | 2.4942                                        | 2.4943                                        | 2.4956                                        |
| N*-HN in A-C (C <sub>1</sub> : <b>12</b> )  | 1.8485                                     | 1.8451                                      | 1.8406                                      | 1.9124                                        | 1.9199                                        | 1.9172                                        |
| NH*-O in A-C (C <sub>1</sub> : <b>13</b> )  | 1.7907                                     | 1.7823                                      | 1.7731                                      | 1.8261                                        | 1.8335                                        | 1.8372                                        |
| N*-HN in A-G (C <sub>1</sub> : <b>14</b> )  | 1.8302                                     | 1.8241                                      | 1.8192                                      | 1.8793                                        | 1.8873                                        | 1.8769                                        |
| NH*-O in A-G (C <sub>1</sub> : <b>15</b> )  | 1.8092                                     | 1.8019                                      | 1.7959                                      | 1.8520                                        | 1.8604                                        | 1.8624                                        |
| CH*-HN in A-G (C <sub>1</sub> : <b>16</b> ) | 2.3914                                     | 2.3822                                      | 2.3798                                      | 2.3888                                        | 2.3893                                        | 2.4124                                        |
| N*-HN in A-U (C <sub>1</sub> : <b>17</b> )  | 1.7579                                     | 1.7508                                      | 1.7472                                      | 1.7699                                        | 1.7713                                        | 1.7692                                        |
| NH*-O in A-U (C <sub>1</sub> : <b>18</b> )  | 1.8952                                     | 1.8880                                      | 1.8796                                      | 1.9353                                        | 1.9390                                        | 1.9370                                        |
| CH*-O in A-U (C <sub>1</sub> : <b>19</b> )  | 2.7262                                     | 2.7094                                      | 2.7076                                      | 2.7321                                        | 2.7315                                        | 2.7335                                        |
| NH*-N in C-C (C <sub>1</sub> : <b>20</b> )  | 1.7613                                     | 1.7559                                      | 1.7522                                      | 1.7953                                        | 1.8008                                        | 1.7967                                        |
| O*-HN in C-C (C <sub>1</sub> : <b>21</b> )  | 1.7432                                     | 1.7371                                      | 1.7270                                      | 1.7748                                        | 1.7868                                        | 1.7894                                        |
| CH*-O in C-C (C <sub>1</sub> : <b>22</b> )  | 2.8352                                     | 2.8195                                      | 2.8203                                      | 2.8769                                        | 2.8763                                        | 2.8704                                        |
| N*-HN in C-T (C <sub>1</sub> : <b>23</b> )  | 1.8406                                     | 1.8292                                      | 1.8292                                      | 1.9205                                        | 1.9309                                        | 1.9270                                        |
| NH*-O in C-T (C <sub>1</sub> : <b>24</b> )  | 1.8204                                     | 1.8152                                      | 1.8059                                      | 1.8559                                        | 1.8629                                        | 1.8631                                        |
| O*-O in C-T (C <sub>1</sub> : <b>25</b> )   | 3.5797                                     | 3.5675                                      | 3.5725                                      | 3.6389                                        | 3.6451                                        | 3.6532                                        |
| N*-HN in C-U (C <sub>1</sub> : <b>26</b> )  | 1.8364                                     | 1.8258                                      | 1.8255                                      | 1.9091                                        | 1.9212                                        | 1.9172                                        |
| NH*-O in C-U (C <sub>1</sub> : <b>27</b> )  | 1.8213                                     | 1.8159                                      | 1.8072                                      | 1.8521                                        | 1.8593                                        | 1.8591                                        |
| O*-O in C-U (C <sub>1</sub> : <b>28</b> )   | 3.5543                                     | 3.5419                                      | 3.5456                                      | 3.6239                                        | 3.6285                                        | 3.6382                                        |
| NH*-O G-G (C <sub>i</sub> : <b>29</b> )     | 1.6928                                     | 1.6888                                      | 1.6825                                      | 1.7240                                        | 1.7378                                        | 1.7344                                        |
| O*-HN G-G (C <sub>i</sub> : <b>30</b> )     | 2.4331                                     | 2.4270                                      | 2.4259                                      | 2.4119                                        | 2.4150                                        | 2.4211                                        |
| N*-HN in G-T (C <sub>1</sub> : <b>31</b> )  | 1.8277                                     | 1.8194                                      | 1.8164                                      | 1.8884                                        | 1.8964                                        | 1.9006                                        |
| NH*-O in G-T (C <sub>1</sub> : <b>32</b> )  | 1.8359                                     | 1.8310                                      | 1.8218                                      | 1.8547                                        | 1.8622                                        | 1.8665                                        |
| NH*-O in G-U (C <sub>1</sub> : <b>33</b> )  | 1.7486                                     | 1.7440                                      | 1.7353                                      | 1.7785                                        | 1.7882                                        | 1.7858                                        |
| O*-HN in G-U (C <sub>1</sub> : <b>34</b> )  | 1.7607                                     | 1.7544                                      | 1.7468                                      | 1.8098                                        | 1.8222                                        | 1.8203                                        |
| NH*-O in T-T (C <sub>1</sub> : <b>35</b> )  | 1.7857                                     | 1.7788                                      | 1.7723                                      | 1.8377                                        | 1.8450                                        | 1.8423                                        |
| O*-HN in T-T (C <sub>1</sub> : <b>36</b> )  | 1.7857                                     | 1.7788                                      | 1.7724                                      | 1.8377                                        | 1.8450                                        | 1.8423                                        |
| NH*-O in T-T ( <sup>g</sup> : <b>37</b> )   | 1.7858                                     | 1.7788                                      | 1.7722                                      | 1.8409                                        | 1.8483                                        | 1.8454                                        |
| NH*-O in T-U (C <sub>1</sub> : <b>38</b> )  | 1.7783                                     | 1.7718                                      | 1.7649                                      | 1.8315                                        | 1.8392                                        | 1.8368                                        |
| O*-HN in T-U (C <sub>1</sub> : <b>39</b> )  | 1.7940                                     | 1.7871                                      | 1.7809                                      | 1.8419                                        | 1.8488                                        | 1.8464                                        |
| NH*-O in U-U (C <sub>1</sub> : <b>40</b> )  | 1.7863                                     | 1.7798                                      | 1.7733                                      | 1.8524                                        | 1.8584                                        | 1.8566                                        |
| O*-HN in U-U (C <sub>1</sub> : <b>41</b> )  | 1.7863                                     | 1.7798                                      | 1.7733                                      | 1.8501                                        | 1.8561                                        | 1.8541                                        |
| NH*-O in U-U (C <sub>s</sub> : <b>42</b> )  | 1.7863                                     | 1.7798                                      | 1.7733                                      | 1.8511                                        | 1.8567                                        | 1.8549                                        |
| O*-HN in U-U (C <sub>s</sub> : <b>43</b> )  | 1.7863                                     | 1.7798                                      | 1.7733                                      | 1.8460                                        | 1.8526                                        | 1.8514                                        |

<sup>a</sup> BSS-A': 6-311+G(3df,3pd). <sup>b</sup> BSS-B'a: 6-311+G(3df,3pd) for O, N, H, and 6-311+G(3d) for C. <sup>c</sup> BSS-B'b: 6-311+G(3df,3pd) for O, N, H, and 6-311+G(d) for C. <sup>d</sup> BSS-A: 6-311++G(3df,3pd). <sup>e</sup> BSS-C: 6-311++G(3df,3p). <sup>f</sup> 6-311++G(3d,3p). <sup>g</sup> The higher symmetry for T-T calculated with MP2/BSS-A', MP2/BSS-B'a, MP2/BSS-B'b, M06-2X/BSS-A, M06-2X/BSS-C, and M06-2X/BSS-D are C<sub>s</sub>, C<sub>i</sub>, C<sub>s</sub>, C<sub>2h</sub>, C<sub>2h</sub>, C<sub>2h</sub> and C<sub>2h</sub>, respectively.

**Table S2.** The  $\Delta E_{ES}$  (kJ mol<sup>-1</sup>) and  $\Delta E_{ZP}$  (kJ mol<sup>-1</sup>) values for Nu-Nu', evaluated with various methods.

| Compds<br>(Symm)              | $\Delta E_{ES}^a$      | $\Delta E_{ES}^a$        | $\Delta E_{ZP}^a$        | $\Delta E_{ES}^a$        | $\Delta E_{ZP}^a$         | $\Delta E_{ES}^a$         | $\Delta E_{ZP}^a$         | $\Delta E_{ES}^a$         | $\Delta E_{ZP}^a$         | $\Delta E_{ES}^a$         | $\Delta E_{ZP}^a$ |
|-------------------------------|------------------------|--------------------------|--------------------------|--------------------------|---------------------------|---------------------------|---------------------------|---------------------------|---------------------------|---------------------------|-------------------|
|                               | MP2/BSS-A <sup>b</sup> | MP2/BSS-B'a <sup>c</sup> | MP2/BSS-B'b <sup>d</sup> | MP2/BSS-B'b <sup>d</sup> | M06-2X/BSS-A <sup>e</sup> | M06-2X/BSS-A <sup>e</sup> | M06-2X/BSS-C <sup>f</sup> | M06-2X/BSS-C <sup>f</sup> | M06-2X/BSS-D <sup>g</sup> | M06-2X/BSS-D <sup>g</sup> |                   |
| A-T ( <i>C</i> <sub>1</sub> ) | -68.4                  | -70.3                    | -66.5                    | -71.3                    | -67.6                     | -58.9                     | -54.9                     | -58.7                     | -53.7                     | -58.8                     | -54.5             |
| A-T ( <i>C</i> <sub>s</sub> ) | -68.4                  | -70.3                    | -66.5                    | -71.3                    | -67.6                     | -59.1                     | -54.9                     | -58.9                     | -53.7                     | -59.0                     | -54.5             |
| C-G ( <i>C</i> <sub>1</sub> ) | -121.4                 | -123.5                   | -117.2                   | -125.0                   | -118.6                    | -113.6                    | -108.7                    | -113.3                    | -108.2                    | -112.3                    | -107.7            |
| A-U ( <i>C</i> <sub>1</sub> ) | -68.7                  | -70.6                    | -66.6                    | -71.4                    | -67.6                     | -59.6                     | -56.4                     | -59.4                     | -56.0                     | -59.5                     | -56.5             |
| A-A ( <i>C</i> <sub>1</sub> ) | -34.1                  | -35.4                    | -32.1                    | -35.8                    | -32.8                     | -26.6                     | -22.8                     | -26.5                     | -22.8                     | -26.7                     | -23.4             |
| A-C ( <i>C</i> <sub>1</sub> ) | -71.2                  | -73.1                    | -68.4                    | -74.2                    | -69.6                     | -60.1                     | -55.7                     | -59.9                     | -55.5                     | -59.8                     | -55.5             |
| A-G ( <i>C</i> <sub>1</sub> ) | -78.8                  | -80.5                    | -75.5                    | -81.2                    | -76.4                     | -68.7                     | -63.2                     | -68.5                     | -63.0                     | -68.7                     | -64.1             |
| C-C ( <i>C</i> <sub>1</sub> ) | -100.7                 | -102.6                   | -96.6                    | -104.2                   | -98.4                     | -91.3                     | -86.2                     | -90.9                     | -85.8                     | -91.1                     | -86.1             |
| C-T ( <i>C</i> <sub>1</sub> ) | -62.2                  | -64.0                    | -60.2                    | -64.8                    | -61.2                     | -52.7                     | -48.3                     | -52.5                     | -47.1                     | -52.6                     | -47.7             |
| C-U ( <i>C</i> <sub>1</sub> ) | -63.1                  | -64.9                    | -60.9                    | -65.5                    | -61.8                     | -54.0                     | -50.4                     | -53.8                     | -50.0                     | -53.9                     | -50.5             |
| G-G ( <i>C</i> <sub>1</sub> ) | -115.3                 | -117.1                   | -112.7                   | -118.3                   | -113.7                    | -109.4                    | -106.7                    | -108.8                    | -106.2                    | -107.8                    | -104.9            |
| G-T ( <i>C</i> <sub>1</sub> ) | -63.6                  | -65.4                    | -62.6                    | -66.3                    | -63.5                     | -54.9                     | -52.3                     | -54.7                     | -51.2                     | -54.0                     | -50.7             |
| G-U ( <i>C</i> <sub>1</sub> ) | -72.8                  | -74.2                    | -70.4                    | -75.4                    | -71.5                     | -65.1                     | -61.7                     | -64.9                     | -61.3                     | -64.9                     | -61.4             |
| T-T ( <i>C</i> <sub>1</sub> ) | -58.5                  | -60.0                    | -56.3                    | -61.6                    | -57.7                     | -50.1                     | -47.3                     | -50.0                     | -45.3                     | -50.3                     | -45.8             |
| T-T ( <i>h</i> )              | -58.7                  | -60.0                    | -56.3                    | -61.6                    | -57.7                     | -50.0                     | -48.1                     | -50.0                     | -46.1                     | -50.2                     | -46.6             |
| T-U ( <i>C</i> <sub>1</sub> ) | -58.5                  | -59.9                    | -56.2                    | -61.2                    | -57.3                     | -50.8                     | -47.9                     | -50.7                     | -46.7                     | -51.0                     | -47.0             |
| U-U ( <i>C</i> <sub>1</sub> ) | -58.4                  | -59.8                    | -55.9                    | -60.8                    | -56.9                     | -49.3                     | -46.6                     | -49.3                     | -46.2                     | -49.5                     | -46.4             |
| U-U ( <i>C</i> <sub>s</sub> ) | -58.4                  | -59.8                    | -55.9                    | -60.8                    | -56.9                     | -49.5                     | -46.5                     | -49.4                     | -46.1                     | -49.6                     | -46.3             |

<sup>a</sup> The units of  $\Delta E_{ES}$  and  $\Delta E_{ZP}$  are given in kJ mol<sup>-1</sup>. <sup>b</sup> BSS-A': 6-311+G(3df,3pd). <sup>c</sup> BSS-B'a: 6-311+G(3df,3pd) for O, N, H, and 6-311+G(3d) for C. <sup>d</sup> BSS-B'b: 6-311+G(3df,3pd) for O, N, H, and 6-311+G(d) for C. <sup>e</sup> BSS-A: 6-311++G(3df,3pd). <sup>f</sup> BSS-C: 6-311++G(3df,3p). <sup>g</sup>6-311++G(3d,3p). <sup>h</sup> The higher symmetry for T-T calculated with MP2/BSS-A', MP2/BSS-B'a, MP2/BSS-B'b, M06-2X/BSS-A, M06-2X/BSS-C, and M06-2X/BSS-D are *C*<sub>s</sub>, *C*<sub>1</sub>, *C*<sub>s</sub>, *C*<sub>2h</sub>, *C*<sub>2h</sub>, *C*<sub>2h</sub> and *C*<sub>2h</sub>, respectively.

**Table S3.** The lengths of bond paths ( $r_{BP}$ ) and the corresponding straight-line distances ( $R_{SL}$ ) in each HB for Nu-Nu', Evaluated with MP2/BSS-B'a.

| AH*-B in Nu-Nu'<br>(symmetry: No.)  | $r_{BP}^a$<br>(Å) | $R_{SL}^b$<br>(Å) | $\Delta r^c$<br>(Å) |
|-------------------------------------|-------------------|-------------------|---------------------|
| N*-HN in A-T ( $C_1$ : <b>1</b> )   | 1.7785            | 1.7527            | 0.0258              |
| NH*-O in A-T ( $C_1$ : <b>2</b> )   | 1.9156            | 1.8861            | 0.0295              |
| CH*-O in A-T ( $C_1$ : <b>3</b> )   | 2.7494            | 2.7138            | 0.0356              |
| NH*-N in A-T ( $C_s$ : <b>4</b> )   | 1.7785            | 1.7527            | 0.0258              |
| NH*-O in A-T ( $C_s$ : <b>5</b> )   | 1.9156            | 1.8861            | 0.0295              |
| CH*-O in A-T ( $C_s$ : <b>6</b> )   | 2.7495            | 2.7138            | 0.0357              |
| NH*-O in C-G ( $C_1$ : <b>7</b> )   | 1.7393            | 1.7104            | 0.0289              |
| N*-HN in C-G ( $C_1$ : <b>8</b> )   | 1.8938            | 1.8677            | 0.0261              |
| O*-HN in C-G ( $C_1$ : <b>9</b> )   | 1.8971            | 1.8687            | 0.0284              |
| NH*-N in A-A ( $C_1$ : <b>10</b> )  | 2.0004            | 1.9722            | 0.0282              |
| CH*-N in A-A ( $C_1$ : <b>11</b> )  | 2.4675            | 2.4455            | 0.0220              |
| N*-HN in A-C ( $C_1$ : <b>12</b> )  | 1.8716            | 1.8451            | 0.0265              |
| NH*-O in A-C ( $C_1$ : <b>13</b> )  | 1.8116            | 1.7823            | 0.0293              |
| N*-HN in A-G ( $C_1$ : <b>14</b> )  | 1.8501            | 1.8241            | 0.0260              |
| NH*-O in A-G ( $C_1$ : <b>15</b> )  | 1.8308            | 1.8019            | 0.0289              |
| CH*-HN in A-G ( $C_1$ : <b>16</b> ) | 2.5794            | 2.3822            | 0.1972              |
| N*-HN in A-U ( $C_1$ : <b>17</b> )  | 1.7766            | 1.7508            | 0.0258              |
| NH*-O in A-U ( $C_1$ : <b>18</b> )  | 1.9176            | 1.8880            | 0.0296              |
| CH*-O in A-U ( $C_1$ : <b>19</b> )  | 2.7450            | 2.7094            | 0.0356              |
| NH*-N in C-C ( $C_1$ : <b>20</b> )  | 1.7822            | 1.7559            | 0.0263              |
| O*-HN in C-C ( $C_1$ : <b>21</b> )  | 1.7664            | 1.7371            | 0.0293              |
| CH*-O in C-C ( $C_1$ : <b>22</b> )  | 2.8704            | 2.8195            | 0.0509              |
| N*-HN in C-T ( $C_1$ : <b>23</b> )  | 1.8566            | 1.8292            | 0.0274              |
| NH*-O in C-T ( $C_1$ : <b>24</b> )  | 1.8441            | 1.8152            | 0.0289              |
| O*-O in C-T ( $C_1$ : <b>25</b> )   | 3.5785            | 3.5675            | 0.0110              |
| N*-HN in C-U ( $C_1$ : <b>26</b> )  | 1.8531            | 1.8258            | 0.0273              |
| NH*-O in C-U ( $C_1$ : <b>27</b> )  | 1.8448            | 1.8159            | 0.0289              |
| O*-O in C-U ( $C_1$ : <b>28</b> )   | 3.5526            | 3.5419            | 0.0107              |
| NH*-O G-G ( $C_i$ : <b>29</b> )     | 1.7152            | 1.6888            | 0.0264              |
| O*-HN G-G ( $C_i$ : <b>30</b> )     | 2.4985            | 2.4270            | 0.0715              |
| N*-HN in G-T ( $C_1$ : <b>31</b> )  | 1.8462            | 1.8194            | 0.0268              |
| NH*-O in G-T ( $C_1$ : <b>32</b> )  | 1.8593            | 1.8310            | 0.0283              |
| NH*-O in G-U ( $C_1$ : <b>33</b> )  | 1.7714            | 1.7440            | 0.0274              |
| O*-HN in G-U ( $C_1$ : <b>34</b> )  | 1.7837            | 1.7544            | 0.0293              |
| NH*-O in T-T ( $C_1$ : <b>35</b> )  | 1.8082            | 1.7788            | 0.0294              |
| O*-HN in T-T ( $C_1$ : <b>36</b> )  | 1.8082            | 1.7788            | 0.0294              |
| NH*-O in T-T ( $C_i$ : <b>37</b> )  | 1.8082            | 1.7788            | 0.0294              |
| NH*-O in T-U ( $C_1$ : <b>38</b> )  | 1.8012            | 1.7718            | 0.0294              |
| O*-HN in T-U ( $C_1$ : <b>39</b> )  | 1.8167            | 1.7871            | 0.0296              |
| NH*-O in U-U ( $C_1$ : <b>40</b> )  | 1.8093            | 1.7798            | 0.0295              |
| O*-HN in U-U ( $C_1$ : <b>41</b> )  | 1.8093            | 1.7798            | 0.0295              |
| NH*-O in U-U ( $C_s$ : <b>42</b> )  | 1.8093            | 1.7798            | 0.0295              |
| O*-HN in U-U ( $C_s$ : <b>43</b> )  | 1.8093            | 1.7798            | 0.0295              |

<sup>a</sup> The lengths of BPs. <sup>b</sup> Straight-line distances. <sup>c</sup>  $\Delta r_{BP} = r_{BP} - R_{SL}$ .

**Table S4.** QAIM functions and QAIM-DFA parameters for each HB of multi-HBs in nucleobase pairs, together with the nature of each HB, elucidated with MP2/BSS-B'b.<sup>a,b</sup>

| AH*-B in Nu-Nu'<br>(Symmetry: No.)  | $\rho_b(r_c)$<br>(au) | $c\nabla^2\rho_b(r_c)^c$<br>(au) | $H_b(r_c)$<br>(au) | $k_b(r_c)^d$ | $R^e$<br>(au) | $\theta^f$<br>(°) | $C_{ii}^g$<br>(unit <sup>j</sup> ) | $\theta_p^h$<br>(°) | $\kappa_p^i$<br>(au <sup>-1</sup> ) | Predicted<br>Nature     |
|-------------------------------------|-----------------------|----------------------------------|--------------------|--------------|---------------|-------------------|------------------------------------|---------------------|-------------------------------------|-------------------------|
| N*-HN in A-T (C <sub>1</sub> : 1)   | 0.0502                | 0.0093                           | -0.0147            | -1.441       | 0.0173        | 147.6             | 3.13                               | 182.6               | 6.5                                 | r-CS/CT-TBP             |
| NH*-O in A-T (C <sub>1</sub> : 2)   | 0.0298                | 0.0116                           | -0.0014            | -1.057       | 0.0117        | 96.9              | 5.63                               | 146.7               | 106.3                               | r-CS/t-HB <sub>wc</sub> |
| CH*-O in A-T (C <sub>1</sub> : 3)   | 0.0060                | 0.0025                           | 0.0006             | -0.849       | 0.0025        | 75.3              | 16.27                              | 81.9                | 69.8                                | p-CS/vdW                |
| NH*-N in A-T (C <sub>s</sub> : 4)   | 0.0502                | 0.0093                           | -0.0147            | -1.441       | 0.0173        | 147.6             | 3.13                               | 182.6               | 6.4                                 | r-CS/CT-TBP             |
| NH*-O in A-T (C <sub>s</sub> : 5)   | 0.0298                | 0.0116                           | -0.0014            | -1.057       | 0.0117        | 96.9              | 5.63                               | 146.7               | 106.3                               | r-CS/t-HB <sub>wc</sub> |
| CH*-O in A-T (C <sub>s</sub> : 6)   | 0.0060                | 0.0025                           | 0.0006             | -0.849       | 0.0025        | 75.3              | 16.27                              | 81.9                | 69.8                                | p-CS/vdW                |
| O*-HN in C-G (C <sub>1</sub> : 7)   | 0.0455                | 0.0136                           | -0.0099            | -1.266       | 0.0168        | 126.0             | 3.16                               | 169.6               | 10.9                                | r-CS/CT-MC              |
| N*-HN in C-G (C <sub>1</sub> : 8)   | 0.0380                | 0.0099                           | -0.0064            | -1.245       | 0.0118        | 123.0             | 2.15                               | 175.2               | 26.6                                | r-CS/CT-MC              |
| NH*-O in C-G (C <sub>1</sub> : 9)   | 0.0311                | 0.0119                           | -0.0020            | -1.076       | 0.0120        | 99.4              | 4.03                               | 149.6               | 91.6                                | r-CS/t-HB <sub>wc</sub> |
| NH*-N in A-A (C <sub>1</sub> : 10)  | 0.0292                | 0.0093                           | -0.0020            | -1.095       | 0.0095        | 101.8             | 5.67                               | 160.1               | 91.1                                | r-CS/CT-MC              |
| CH*-N in A-A (C <sub>1</sub> : 11)  | 0.0120                | 0.0045                           | 0.0012             | -0.841       | 0.0047        | 74.7              | 16.53                              | 76.0                | 51.0                                | p-CS/vdW                |
| N*-HN in A-C (C <sub>1</sub> : 12)  | 0.0395                | 0.0101                           | -0.0074            | -1.267       | 0.0125        | 126.1             | 3.67                               | 174.5               | 21.0                                | r-CS/CT-MC              |
| NH*-O in A-C (C <sub>1</sub> : 13)  | 0.0372                | 0.0136                           | -0.0046            | -1.145       | 0.0144        | 108.7             | 3.61                               | 158.4               | 36.5                                | r-CS/CT-MC              |
| N*-HN in A-G (C <sub>1</sub> : 14)  | 0.0429                | 0.0097                           | -0.0094            | -1.326       | 0.0135        | 134.1             | 3.50                               | 179.0               | 9.5                                 | r-CS/CT-MC              |
| NH*-O in A-G (C <sub>1</sub> : 15)  | 0.0366                | 0.0126                           | -0.0046            | -1.154       | 0.0135        | 110.1             | 4.40                               | 161.1               | 42.4                                | r-CS/CT-MC              |
| CH*-HN in A-G (C <sub>1</sub> : 16) | 0.0056                | 0.0026                           | 0.0009             | -0.796       | 0.0027        | 71.3              | 30.25                              | 78.4                | 108.3                               | p-CS/vdW                |
| N*-HN in A-U (C <sub>1</sub> : 17)  | 0.0505                | 0.0092                           | -0.0149            | -1.446       | 0.0175        | 148.1             | 3.12                               | 182.8               | 6.2                                 | r-CS/CT-TBP             |
| NH*-O in A-U (C <sub>1</sub> : 18)  | 0.0295                | 0.0116                           | -0.0013            | -1.053       | 0.0116        | 96.3              | 5.66                               | 145.8               | 109.3                               | r-CS/t-HB <sub>wc</sub> |
| CH*-O in A-U (C <sub>1</sub> : 19)  | 0.0061                | 0.0025                           | 0.0006             | -0.850       | 0.0026        | 75.4              | 16.27                              | 81.7                | 69.8                                | p-CS/vdW                |
| NH*-N in C-C (C <sub>1</sub> : 20)  | 0.0492                | 0.0099                           | -0.0137            | -1.409       | 0.0170        | 144.2             | 2.61                               | 180.7               | 4.5                                 | r-CS/CT-TBP             |
| O*-HN in C-C (C <sub>1</sub> : 21)  | 0.0431                | 0.0133                           | -0.0084            | -1.241       | 0.0157        | 122.4             | 3.77                               | 168.3               | 15.7                                | r-CS/CT-MC              |
| CH*-O in C-C (C <sub>1</sub> : 22)  | 0.0050                | 0.0021                           | 0.0006             | -0.824       | 0.0022        | 73.3              | 14.38                              | 83.4                | 57.2                                | p-CS/vdW                |
| N*-HN in C-T (C <sub>1</sub> : 23)  | 0.0406                | 0.0096                           | -0.0083            | -1.303       | 0.0127        | 131.0             | 4.81                               | 178.1               | 19.4                                | r-CS/CT-MC              |
| NH*-O in C-T (C <sub>1</sub> : 24)  | 0.0356                | 0.0126                           | -0.0040            | -1.138       | 0.0132        | 107.7             | 4.66                               | 159.4               | 49.7                                | r-CS/CT-MC              |
| O*-O in C-T (C <sub>1</sub> : 25)   | 0.0027                | 0.0013                           | 0.0005             | -0.762       | 0.0014        | 69.0              | 31.80                              | 88.7                | 369.5                               | p-CS/vdW                |
| N*-HN in C-U (C <sub>1</sub> : 26)  | 0.0410                | 0.0096                           | -0.0086            | -1.310       | 0.0128        | 131.9             | 4.76                               | 178.5               | 12.3                                | r-CS/CT-MC              |
| NH*-O in C-U (C <sub>1</sub> : 27)  | 0.0354                | 0.0126                           | -0.0039            | -1.135       | 0.0132        | 107.3             | 4.67                               | 159.0               | 50.5                                | r-CS/CT-MC              |
| O*-O in C-U (C <sub>1</sub> : 28)   | 0.0029                | 0.0013                           | 0.0005             | -0.774       | 0.0014        | 69.7              | 30.68                              | 89.8                | 344.2                               | p-CS/vdW                |
| NH*-O G-G (C <sub>i</sub> : 29)     | 0.0507                | 0.0137                           | -0.0127            | -1.316       | 0.0187        | 132.8             | 2.83                               | 172.2               | 8.1                                 | r-CS/CT-MC              |
| O*-HN G-G (C <sub>i</sub> : 30)     | 0.0083                | 0.0044                           | 0.0014             | -0.804       | 0.0046        | 71.9              | 13.06                              | 73.2                | 20.2                                | p-CS/vdW                |
| N*-HN in G-T (C <sub>1</sub> : 31)  | 0.0419                | 0.0100                           | -0.0089            | -1.308       | 0.0134        | 131.6             | 3.88                               | 177.2               | 16.0                                | r-CS/CT-MC              |
| NH*-O in G-T (C <sub>1</sub> : 32)  | 0.0343                | 0.0124                           | -0.0034            | -1.120       | 0.0129        | 105.2             | 4.82                               | 156.9               | 60.3                                | r-CS/CT-MC              |
| NH*-O in G-U (C <sub>1</sub> : 33)  | 0.0428                | 0.0139                           | -0.0077            | -1.216       | 0.0159        | 118.9             | 3.02                               | 165.9               | 19.4                                | r-CS/CT-MC              |
| O*-HN in G-U (C <sub>1</sub> : 34)  | 0.0411                | 0.0128                           | -0.0073            | -1.221       | 0.0148        | 119.6             | 4.24                               | 167.5               | 20.9                                | r-CS/CT-MC              |
| NH*-O in T-T (C <sub>1</sub> : 35)  | 0.0380                | 0.0130                           | -0.0053            | -1.169       | 0.0141        | 112.1             | 4.23                               | 163.7               | 32.2                                | r-CS/CT-MC              |
| O*-HN in T-T (C <sub>1</sub> : 36)  | 0.0380                | 0.0131                           | -0.0053            | -1.169       | 0.0141        | 112.1             | 4.22                               | 163.7               | 32.2                                | r-CS/CT-MC              |
| NH*-O in T-T (C <sub>i</sub> : 37)  | 0.0380                | 0.0131                           | -0.0053            | -1.169       | 0.0141        | 112.1             | 4.22                               | 163.7               | 28.4                                | r-CS/CT-MC              |
| NH*-O in T-U (C <sub>1</sub> : 38)  | 0.0387                | 0.0131                           | -0.0057            | -1.178       | 0.0143        | 113.4             | 4.10                               | 164.5               | 29.0                                | r-CS/CT-MC              |
| O*-HN in T-U (C <sub>1</sub> : 39)  | 0.0372                | 0.0130                           | -0.0048            | -1.157       | 0.0138        | 110.4             | 4.35                               | 162.4               | 36.2                                | r-CS/CT-MC              |
| NH*-O in U-U (C <sub>1</sub> : 40)  | 0.0379                | 0.0130                           | -0.0052            | -1.166       | 0.0140        | 111.8             | 4.23                               | 163.3               | 32.6                                | r-CS/CT-MC              |
| O*-HN in U-U (C <sub>1</sub> : 41)  | 0.0379                | 0.0130                           | -0.0052            | -1.166       | 0.0140        | 111.8             | 4.23                               | 163.3               | 32.6                                | r-CS/CT-MC              |
| NH*-O in U-U (C <sub>s</sub> : 42)  | 0.0379                | 0.0130                           | -0.0052            | -1.166       | 0.0140        | 111.8             | 4.23                               | 163.3               | 28.8                                | r-CS/CT-MC              |
| O*-HN in U-U (C <sub>s</sub> : 43)  | 0.0379                | 0.0130                           | -0.0052            | -1.166       | 0.0140        | 111.8             | 4.23                               | 163.3               | 28.8                                | r-CS/CT-MC              |

<sup>a</sup> BSS-B'b: 6-311+G(3df,3pd) for O, N, H, and 6-311+G(d) for C. <sup>b</sup> Data are given at BCPS. <sup>c</sup>  $c\nabla^2\rho_b(r_c) = H_b(r_c) - V_b(r_c)/2$ , where  $c = \hbar^2/8m$ . <sup>d</sup>  $k_b(r_c) = V_b(r_c)/G_b(r_c)$ . <sup>e</sup>  $R = (x + y)^{1/2}$ , where  $(x, y = H_b(r_c) - V_b(r_c)/2, H_b(r_c))$ . <sup>f</sup>  $\theta = 90^\circ - \tan^{-1}(y/x)$ . <sup>g</sup> Compliance force constants. <sup>h</sup>  $\theta_p = 90^\circ - \tan^{-1}(dy/dx)$ . <sup>i</sup>  $\kappa_p = |d^2y/dx^2|/[1 + (dy/dx)^2]^{3/2}$ . <sup>j</sup> Å mdy<sup>-1</sup>.

**Table S5.** QTAIM functions and QTAIM-DFA parameters for each HB of multi-HBs in Some nucleobase pairs, together with the nature of each HB, evaluated with various basis sets for M06-2X Level.<sup>a</sup>

| AH*-B in Nu-Nu'<br>(Symmetry: No.) | $\rho_b(\mathbf{r}_c)$<br>(au) | $c\nabla^2\rho_b(\mathbf{r}_c)^b$<br>(au) | $H_b(\mathbf{r}_c)$<br>(au) | $k_b(\mathbf{r}_c)^c$ | $R^d$<br>(au) | $\theta^e$<br>(°) | $C_{ii}^f$<br>(unit <sup>i</sup> ) | $\theta_p^g$<br>(°) | $\kappa_p^h$<br>(au <sup>-1</sup> ) | Predicted<br>Nature     |
|------------------------------------|--------------------------------|-------------------------------------------|-----------------------------|-----------------------|---------------|-------------------|------------------------------------|---------------------|-------------------------------------|-------------------------|
| M06-2X/BSS-A <sup>j</sup>          |                                |                                           |                             |                       |               |                   |                                    |                     |                                     |                         |
| N*-HN in A-T (C <sub>1</sub> : 1)  | 0.0470                         | 0.0092                                    | -0.0125                     | -1.404                | 0.0155        | 143.6             | 3.81                               | 186.0               | 3.6                                 | r-CS/CT-TBP             |
| NH*-O in A-T (C <sub>1</sub> : 2)  | 0.0252                         | 0.0115                                    | 0.0011                      | -0.949                | 0.0116        | 84.5              | 6.07                               | 124.4               | 218.8                               | p-CS/t-HB <sub>nc</sub> |
| CH*-O in A-T (C <sub>1</sub> : 3)  | 0.0055                         | 0.0023                                    | 0.0007                      | -0.823                | 0.0024        | 73.3              | 20.49                              | 78.9                | 103.9                               | p-CS/vdW                |
| O*-HN in C-G (C <sub>1</sub> : 7)  | 0.0402                         | 0.0137                                    | -0.0061                     | -1.181                | 0.0150        | 113.9             | 3.88                               | 174.8               | 36.4                                | r-CS/CT-MC              |
| N*-HN in C-G (C <sub>1</sub> : 8)  | 0.0342                         | 0.0103                                    | -0.0037                     | -1.153                | 0.0110        | 109.8             | 2.22                               | 178.1               | 45.3                                | r-CS/CT-MC              |
| NH*-O in C-G (C <sub>1</sub> : 9)  | 0.0273                         | 0.0121                                    | 0.0005                      | -0.981                | 0.0121        | 87.8              | 3.95                               | 135.4               | 199.8                               | p-CS/t-HB <sub>nc</sub> |
| NH*-O in T-T (C <sub>1</sub> : 35) | 0.0311                         | 0.0133                                    | -0.0008                     | -1.030                | 0.0133        | 93.6              | 5.50                               | 153.4               | 126.8                               | r-CS/CT-MC              |
| NH*-O in T-U (C <sub>1</sub> : 38) | 0.0317                         | 0.0133                                    | -0.0011                     | -1.040                | 0.0134        | 94.7              | 4.84                               | 155.8               | 118.0                               | r-CS/CT-MC              |
| O*-HN in T-U (C <sub>1</sub> : 39) | 0.0308                         | 0.0132                                    | -0.0007                     | -1.026                | 0.0132        | 93.0              | 4.76                               | 152.4               | 133.2                               | r-CS/CT-MC              |
| NH*-O in U-U (C <sub>1</sub> : 40) | 0.0298                         | 0.0132                                    | -0.0001                     | -1.005                | 0.0132        | 90.6              | 4.97                               | 147.3               | 152.1                               | r-CS/t-HB <sub>wc</sub> |
| M06-2X/BSS-C <sup>k</sup>          |                                |                                           |                             |                       |               |                   |                                    |                     |                                     |                         |
| N*-HN in A-T (C <sub>1</sub> : 1)  | 0.0460                         | 0.0107                                    | -0.0097                     | -1.313                | 0.0144        | 132.3             | 4.04                               | 184.0               | 11.6                                | r-CS/CT-TBP             |
| NH*-O in A-T (C <sub>1</sub> : 2)  | 0.0248                         | 0.0117                                    | 0.0015                      | -0.933                | 0.0118        | 82.8              | 5.91                               | 112.1               | 164.8                               | p-CS/t-HB <sub>nc</sub> |
| CH*-O in A-T (C <sub>1</sub> : 3)  | 0.0055                         | 0.0023                                    | 0.0007                      | -0.815                | 0.0024        | 72.6              | 20.18                              | 77.7                | 86.4                                | p-CS/vdW                |
| O*-HN in C-G (C <sub>1</sub> : 7)  | 0.0381                         | 0.0149                                    | -0.0032                     | -1.097                | 0.0152        | 102.1             | 3.89                               | 161.4               | 68.9                                | r-CS/CT-MC              |
| N*-HN in C-G (C <sub>1</sub> : 8)  | 0.0329                         | 0.0111                                    | -0.0020                     | -1.083                | 0.0113        | 100.3             | 2.22                               | 168.4               | 100.7                               | r-CS/CT-MC              |
| NH*-O in C-G (C <sub>1</sub> : 9)  | 0.0268                         | 0.0124                                    | 0.0010                      | -0.958                | 0.0124        | 85.4              | 3.89                               | 120.4               | 170.2                               | p-CS/t-HB <sub>nc</sub> |
| NH*-O in T-T (C <sub>1</sub> : 35) | 0.0302                         | 0.0137                                    | 0.0003                      | -0.990                | 0.0137        | 88.9              | 5.26                               | 136.8               | 150.2                               | p-CS/t-HB <sub>nc</sub> |
| NH*-O in T-U (C <sub>1</sub> : 38) | 0.0307                         | 0.0138                                    | 0.0001                      | -0.997                | 0.0138        | 89.7              | 4.58                               | 139.1               | 146.5                               | p-CS/t-HB <sub>nc</sub> |
| O*-HN in T-U (C <sub>1</sub> : 39) | 0.0299                         | 0.0136                                    | 0.0003                      | -0.988                | 0.0136        | 88.6              | 4.53                               | 136.0               | 153.7                               | p-CS/t-HB <sub>nc</sub> |
| NH*-O in U-U (C <sub>1</sub> : 40) | 0.0291                         | 0.0136                                    | 0.0007                      | -0.972                | 0.0136        | 86.9              | 4.80                               | 131.4               | 158.7                               | p-CS/t-HB <sub>nc</sub> |
| M06-2X/BSS-C <sup>l</sup>          |                                |                                           |                             |                       |               |                   |                                    |                     |                                     |                         |
| N*-HN in A-T (C <sub>1</sub> : 1)  | 0.0460                         | 0.0107                                    | -0.0097                     | -1.313                | 0.0144        | 132.3             | 4.03                               | 184.0               | 11.6                                | r-CS/CT-TBP             |
| NH*-O in A-T (C <sub>1</sub> : 2)  | 0.0248                         | 0.0117                                    | 0.0015                      | -0.933                | 0.0118        | 82.8              | 5.91                               | 112.2               | 164.1                               | p-CS/t-HB <sub>nc</sub> |
| CH*-O in A-T (C <sub>1</sub> : 3)  | 0.0055                         | 0.0023                                    | 0.0007                      | -0.814                | 0.0024        | 72.6              | 20.75                              | 77.8                | 74.1                                | p-CS/vdW                |
| O*-HN in C-G (C <sub>1</sub> : 7)  | 0.0381                         | 0.0149                                    | -0.0032                     | -1.097                | 0.0152        | 102.1             | 3.89                               | 161.4               | 68.6                                | r-CS/CT-MC              |
| N*-HN in C-G (C <sub>1</sub> : 8)  | 0.0330                         | 0.0111                                    | -0.0020                     | -1.083                | 0.0113        | 100.3             | 2.22                               | 168.4               | 100.5                               | r-CS/CT-MC              |
| NH*-O in C-G (C <sub>1</sub> : 9)  | 0.0268                         | 0.0124                                    | 0.0010                      | -0.958                | 0.0124        | 85.4              | 3.90                               | 120.4               | 170.3                               | p-CS/t-HB <sub>nc</sub> |
| NH*-N in A-A (C <sub>1</sub> : 10) | 0.0239                         | 0.0097                                    | 0.0011                      | -0.938                | 0.0098        | 83.3              | 6.34                               | 127.1               | 261.8                               | p-CS/t-HB <sub>nc</sub> |
| CH*-N in A-A (C <sub>1</sub> : 11) | 0.0106                         | 0.0041                                    | 0.0014                      | -0.795                | 0.0044        | 71.2              | 18.21                              | 70.6                | 35.0                                | p-CS/vdW                |
| NH*-O in T-T (C <sub>1</sub> : 35) | 0.0302                         | 0.0137                                    | 0.0003                      | -0.990                | 0.0137        | 88.9              | 5.24                               | 136.8               | 150.2                               | p-CS/t-HB <sub>nc</sub> |
| NH*-O in U-U (C <sub>1</sub> : 40) | 0.0290                         | 0.0135                                    | 0.0007                      | -0.973                | 0.0135        | 87.0              | 4.82                               | 131.5               | 160.2                               | p-CS/t-HB <sub>nc</sub> |
| M06-2X/BSS-D <sup>m</sup>          |                                |                                           |                             |                       |               |                   |                                    |                     |                                     |                         |
| N*-HN in A-T (C <sub>1</sub> : 1)  | 0.0459                         | 0.0109                                    | -0.0092                     | -1.299                | 0.0143        | 130.4             | 4.03                               | 183.5               | 14.3                                | r-CS/CT-TBP             |
| NH*-O in A-T (C <sub>1</sub> : 2)  | 0.0247                         | 0.0117                                    | 0.0017                      | -0.922                | 0.0118        | 81.7              | 5.84                               | 109.8               | 161.2                               | p-CS/t-HB <sub>nc</sub> |
| CH*-O in A-T (C <sub>1</sub> : 3)  | 0.0055                         | 0.0023                                    | 0.0007                      | -0.823                | 0.0024        | 73.3              | 20.41                              | 78.6                | 90.7                                | p-CS/vdW                |
| O*-HN in C-G (C <sub>1</sub> : 7)  | 0.0377                         | 0.0150                                    | -0.0027                     | -1.082                | 0.0152        | 100.1             | 3.87                               | 158.9               | 73.6                                | r-CS/CT-MC              |
| N*-HN in C-G (C <sub>1</sub> : 8)  | 0.0329                         | 0.0112                                    | -0.0017                     | -1.071                | 0.0114        | 98.7              | 2.29                               | 167.4               | 104.5                               | r-CS/CT-MC              |
| NH*-O in C-G (C <sub>1</sub> : 9)  | 0.0264                         | 0.0123                                    | 0.0013                      | -0.944                | 0.0124        | 83.9              | 4.00                               | 116.6               | 170.5                               | p-CS/t-HB <sub>nc</sub> |
| NH*-O in T-T (C <sub>1</sub> : 35) | 0.0303                         | 0.0137                                    | 0.0004                      | -0.983                | 0.0138        | 88.1              | 5.21                               | 135.3               | 152.1                               | p-CS/t-HB <sub>nc</sub> |
| NH*-O in T-U (C <sub>1</sub> : 38) | 0.0307                         | 0.0138                                    | 0.0003                      | -0.990                | 0.0138        | 88.8              | 4.55                               | 137.5               | 149.1                               | p-CS/t-HB <sub>nc</sub> |
| O*-HN in T-U (C <sub>1</sub> : 39) | 0.0299                         | 0.0136                                    | 0.0005                      | -0.980                | 0.0137        | 87.8              | 4.50                               | 134.5               | 155.9                               | p-CS/t-HB <sub>nc</sub> |
| NH*-O in U-U (C <sub>1</sub> : 40) | 0.0290                         | 0.0136                                    | 0.0009                      | -0.965                | 0.0136        | 86.1              | 4.77                               | 129.7               | 160.1                               | p-CS/t-HB <sub>nc</sub> |

<sup>a</sup> Data are given at BCPs. <sup>b</sup>  $c\nabla^2\rho_b(\mathbf{r}_c) = H_b(\mathbf{r}_c) - V_b(\mathbf{r}_c)/2$ , where  $c = \hbar^2/8m$ . <sup>c</sup>  $k_b(\mathbf{r}_c) = V_b(\mathbf{r}_c)/G_b(\mathbf{r}_c)$ . <sup>d</sup>  $R = (x + y)^{1/2}$ , where  $(x, y = H_b(\mathbf{r}_c) - V_b(\mathbf{r}_c)/2, H_b(\mathbf{r}_c))$ . <sup>e</sup>  $\theta = 90^\circ - \tan^{-1}(y/x)$ . <sup>f</sup> Compliance force constants. <sup>g</sup>  $\theta_p = 90^\circ - \tan^{-1}(dy/dx)$ . <sup>h</sup>  $\kappa_p = |d^2y/dx^2|/[1 + (dy/dx)^2]^{3/2}$ . <sup>i</sup> Å mdyn<sup>-1</sup>. <sup>j</sup> BSS-A: 6-311++G(3df,3pd). <sup>k</sup> BSS-C: 6-311++G(3df,3p). <sup>l</sup> BSS-C: 6-311++G(3df,3p). <sup>m</sup> 6-311++G(3d,3p).

**Table S6.** The structural parameters of the  $\Delta E_{ES}$  and  $\Delta E_{ZP}$  values and fractionalization of the total values of  $\Delta E$  to each HB ( $\Delta E_e$ ), evaluated with MP2/BSS-A for the acetic acid dimer and the related species **I–III**, together with the  $C_{ii}$  values.<sup>a</sup>

| Dimers<br>(symm)             | AH-*-X  | $\Delta E_{ES}^b$<br>(kJ mol <sup>-1</sup> ) | $\Delta E_{ZP}^c$<br>(kJ mol <sup>-1</sup> ) | $\Delta E_e$<br>(kJ mol <sup>-1</sup> ) | $C_{ii}$<br>(Å mdyne <sup>-1</sup> ) |
|------------------------------|---------|----------------------------------------------|----------------------------------------------|-----------------------------------------|--------------------------------------|
| <b>I</b> (C <sub>2h</sub> )  | OH-*-O  | -72.4                                        | -66.2                                        | -36.2                                   | 3.19                                 |
| <b>IIa</b> (C <sub>i</sub> ) | NH-*-O  | -65.0                                        | -55.3                                        | -32.5                                   | 4.41                                 |
| <b>IIb</b> (C <sub>i</sub> ) | NH-*-S  | -55.2                                        | -49.0                                        | -27.6                                   | 5.82                                 |
| <b>IIc</b> (C <sub>i</sub> ) | NH-*-Se | -55.6                                        | -50.7                                        | -27.8                                   | 5.93                                 |
| <b>III</b> (C <sub>1</sub> ) | OH-*-O  | -70.6                                        | -62.8                                        | -43.1                                   | 3.01                                 |
|                              | NH-*-O  |                                              |                                              | -27.5                                   | 4.72                                 |

<sup>a</sup>With the MP2/6-311++G(3df,3pd) method of the Gaussian 09 program. <sup>b</sup>The energies on the energy surface from the components ( $\Delta E_{ES}$ ) [=  $E_{ES}(\text{HB}) - E_{ES}(\text{components})$ ]. <sup>c</sup>The energies with the zero-point energy collections from the components ( $\Delta E$ ) [=  $E(\text{HB}) - E(\text{components})$ ].

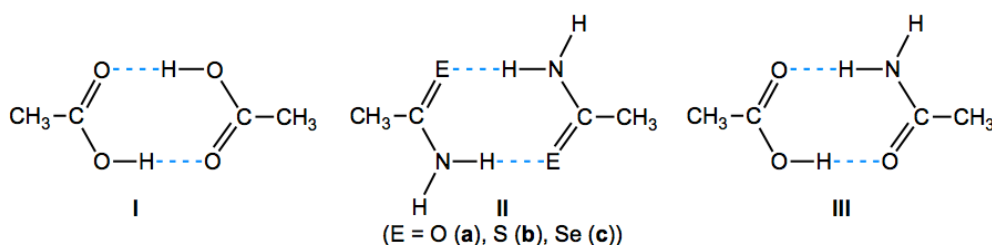

**Chart S1.** Structures of acetic acid dimer (**I**) and related species (**IIa–IIc** and **III**)

**Table S7.** The  $w'_{ij}/w_i$  ratios for the interactions of each HB in Nu-Nu' evaluated with CIV and POM of the under MP2/BSS-B'a.<sup>a-c</sup>

| Interaction                   | $(w'_{1j}/w_1)_{CIV}^d$ | $(w'_{2j}/w_2)_{CIV}^d$ | $(w'_{3j}/w_3)_{CIV}^d$ | $(w'_{1j}/w_1)_{POM}^d$ | $(w'_{2j}/w_2)_{POM}^d$ | $(w'_{3j}/w_3)_{POM}^d$ |
|-------------------------------|-------------------------|-------------------------|-------------------------|-------------------------|-------------------------|-------------------------|
| AH-*-B ( <i>j</i> )           | ( <i>i</i> = 1)         | ( <i>i</i> = 2)         | ( <i>i</i> = 3)         | ( <i>i</i> = 1)         | ( <i>i</i> = 2)         | ( <i>i</i> = 3)         |
| A-T ( <i>C</i> <sub>1</sub> ) |                         |                         |                         |                         |                         |                         |
| NH-*-O ( <i>j</i> = 1)        | 1.0000                  | 0.1969                  | -0.2370                 | 1.0000                  | 0.1807                  | -0.2320                 |
| N-*-HN ( <i>j</i> = 2)        | 0.1058                  | 1.0000                  | 0.2774                  | 0.1051                  | 1.0000                  | 0.2800                  |
| NH-*-O ( <i>j</i> = 3)        | -0.6674                 | 1.4505                  | 1.0000                  | -0.6674                 | 1.4909                  | 1.0000                  |
| C-G ( <i>C</i> <sub>1</sub> ) |                         |                         |                         |                         |                         |                         |
| O-*-HN ( <i>j</i> = 1)        | 1.0000                  | 0.4951                  | -0.0537                 | 1.0000                  | 0.5155                  | -0.0563                 |
| N-*-HN ( <i>j</i> = 2)        | 0.2589                  | 1.0000                  | 0.3481                  | 0.2619                  | 1.0000                  | 0.3481                  |
| NH-*-O ( <i>j</i> = 3)        | -0.0420                 | 0.5204                  | 1.0000                  | -0.0420                 | 0.5291                  | 1.0000                  |
| A-A ( <i>C</i> <sub>1</sub> ) |                         |                         |                         |                         |                         |                         |
| NH-*-N ( <i>j</i> = 1)        | 1.0000                  | -0.0076                 |                         | 1.0000                  | -0.0098                 |                         |
| N-*-HC ( <i>j</i> = 2)        | -0.0204                 | 1.0000                  |                         | -0.0231                 | 1.0000                  |                         |
| T-T ( <i>C</i> <sub>1</sub> ) |                         |                         |                         |                         |                         |                         |
| NH-*-O ( <i>j</i> = 1)        | 1.0000                  |                         |                         | 1.0000                  |                         |                         |
| ( <i>j</i> = 2)               | 0.1126                  |                         |                         | 0.1088                  |                         |                         |
| U-U ( <i>C</i> <sub>1</sub> ) |                         |                         |                         |                         |                         |                         |
| NH-*-O ( <i>j</i> = 1)        | 1.0000                  |                         |                         | 1.0000                  |                         |                         |
| ( <i>j</i> = 2)               | 0.1232                  |                         |                         | 0.1194                  |                         |                         |

<sup>a</sup> BSS-B'a: The 6-311+G(3df,3pd) for O, N, H, and 6-311+G(3d) for C. <sup>b</sup> The  $w'_{ij}/w_i$  values are calculated at  $w = 0.05$  (see eqns (5) and (13) in the text). <sup>c</sup> *i* and *j* for  $w'_{ij}/w_i$  represent the interaction in question and the other ones, respectively. <sup>d</sup> The  $w'_{ij}/w_i$  values are calculated with  $w = 0.05$ .



**Table S8.** The  $w'_{ij}/w_i$  ratios for the interactions of each HB in Nu-Nu' evaluated with CIV and POM with M06-2X/BSS-C'.<sup>a-c</sup>

| Interaction                   | $(w'_{1j}/w_1)_{CIV}^d$ | $(w'_{2j}/w_2)_{CIV}^d$ | $(w'_{3j}/w_3)_{CIV}^d$ | $(w'_{1j}/w_1)_{POM}^d$ | $(w'_{2j}/w_2)_{POM}^d$ | $(w'_{3j}/w_3)_{POM}^d$ |
|-------------------------------|-------------------------|-------------------------|-------------------------|-------------------------|-------------------------|-------------------------|
| AH-*-B ( <i>j</i> )           | ( <i>i</i> = 1)         | ( <i>i</i> = 2)         | ( <i>i</i> = 3)         | ( <i>i</i> = 1)         | ( <i>i</i> = 2)         | ( <i>i</i> = 3)         |
| A-T ( <i>C</i> <sub>1</sub> ) |                         |                         |                         |                         |                         |                         |
| NH-*-O ( <i>j</i> = 1)        | 1.0000                  | 0.1281                  | -0.2101                 | 1.0000                  | 0.0695                  | -0.2094                 |
| N-*-HN ( <i>j</i> = 2)        | 0.0877                  | 1.0000                  | 0.3095                  | 0.0945                  | 1.0000                  | 0.3100                  |
| NH-*-O ( <i>j</i> = 3)        | -0.7381                 | 1.5903                  | 1.0000                  | -0.7203                 | 1.7082                  | 1.0000                  |
| C-G ( <i>C</i> <sub>1</sub> ) |                         |                         |                         |                         |                         |                         |
| O-*-HN ( <i>j</i> = 1)        | 1.0000                  | 0.5321                  | -0.0737                 | 1.0000                  | 0.5431                  | -0.0782                 |
| N-*-HN ( <i>j</i> = 2)        | 0.3031                  | 1.0000                  | 0.3685                  | 0.3046                  | 1.0000                  | 0.3677                  |
| NH-*-O ( <i>j</i> = 3)        | -0.0737                 | 0.6455                  | 1.0000                  | -0.0741                 | 0.6553                  | 1.0000                  |
| A-A ( <i>C</i> <sub>1</sub> ) |                         |                         |                         |                         |                         |                         |
| NH-*-N ( <i>j</i> = 1)        | 1.0000                  | -0.0008                 |                         | 1.0000                  | -0.0181                 |                         |
| N-*-HC ( <i>j</i> = 2)        | 0.0034                  | 1.0000                  |                         | -0.0185                 | 1.0000                  |                         |
| T-T ( <i>C</i> <sub>1</sub> ) |                         |                         |                         |                         |                         |                         |
| NH-*-O ( <i>j</i> = 1)        | 1.0000                  |                         |                         | 1.0000                  |                         |                         |
|                               | -0.0008                 |                         |                         | 0.0106                  |                         |                         |
| U-U ( <i>C</i> <sub>1</sub> ) |                         |                         |                         |                         |                         |                         |
| NH-*-O ( <i>j</i> = 1)        | 1.0000                  |                         |                         | 1.0000                  |                         |                         |
|                               | 0.0612                  |                         |                         | 0.0559                  |                         |                         |

<sup>a</sup> BSS-B'a: The 6-311+G(3df,3pd) for O, N, H, and 6-311+G(3d) for C. <sup>b</sup> The  $w'_{ij}/w_i$  values are calculated with  $w = 0.05$  and  $0.1$  (see eqns (5) and (13) in the text). <sup>c</sup> *i* and *j* for  $w'_{ij}/w_i$  represent the interaction in question and the other ones, respectively. <sup>d</sup> The  $w'_{ij}/w_i$  values are calculated with  $w = 0.05$ .

**Table S9.** QTAIM-DFA parameters for each HB of multi-HBs in Some nucleobase pairs, elucidated by employing the perturbed structures generated with CIV and POM methods, together with the nature of each HB and the differences between  $\theta_{p:CIV}$  and  $\theta_{p:POM}$ ,  $\kappa_{p:CIV}$  and  $\kappa_{p:POM}$ , evaluated with M06-2X/BSS-C'.<sup>a</sup>

| AH-*-B in Nu-Nu'<br>(Symmetry: No.) | $\theta_{p:CIV}$<br>(°) | $\theta_{p:POM}$<br>(°) | $\Delta\theta_p^b$<br>(°) | $\kappa_{p:CIV}$<br>(au <sup>-1</sup> ) | $\kappa_{p:POM}$<br>(au <sup>-1</sup> ) | $\Delta\kappa_p^c$<br>(au <sup>-1</sup> ) | Predicted<br>Nature                      |
|-------------------------------------|-------------------------|-------------------------|---------------------------|-----------------------------------------|-----------------------------------------|-------------------------------------------|------------------------------------------|
| N-*-HN in A-T ( $C_1$ : <b>1</b> )  | 184.0                   | 184.0                   | 0.0                       | 16.5                                    | 11.6                                    | 4.9                                       | <i>r</i> -CS/CT-TBP                      |
| NH-*-O in A-T ( $C_1$ : <b>2</b> )  | 112.1                   | 112.2                   | -0.1                      | 163.9                                   | 164.1                                   | -0.2                                      | <i>p</i> -CS/ <i>t</i> -HB <sub>nc</sub> |
| CH-*-O in A-T ( $C_1$ : <b>3</b> )  | 77.8                    | 77.8                    | 0.0                       | 75.9                                    | 74.1                                    | 1.8                                       | <i>p</i> -CS/vdW                         |
| O-*-HN in C-G ( $C_1$ : <b>7</b> )  | 161.4                   | 161.4                   | 0.0                       | 74.6                                    | 68.6                                    | 6.0                                       | <i>r</i> -CS/CT-MC                       |
| N-*-HN in C-G ( $C_1$ : <b>8</b> )  | 168.4                   | 168.4                   | 0.0                       | 109.8                                   | 100.5                                   | 9.3                                       | <i>r</i> -CS/CT-MC                       |
| NH-*-O in C-G ( $C_1$ : <b>9</b> )  | 120.4                   | 120.4                   | 0.0                       | 171.9                                   | 170.3                                   | 1.6                                       | <i>p</i> -CS/ <i>t</i> -HB <sub>nc</sub> |
| NH-*-N in A-A ( $C_1$ : <b>10</b> ) | 127.1                   | 127.1                   | 0.0                       | 268.0                                   | 261.8                                   | 6.2                                       | <i>p</i> -CS/ <i>t</i> -HB <sub>nc</sub> |
| CH-*-N in A-A ( $C_1$ : <b>11</b> ) | 70.5                    | 70.6                    | -0.1                      | 38.5                                    | 35.0                                    | 3.5                                       | <i>p</i> -CS/vdW                         |
| NH-*-O in T-T ( $C_1$ : <b>35</b> ) | 136.8                   | 136.8                   | 0.0                       | 155.8                                   | 150.2                                   | 5.6                                       | <i>p</i> -CS/ <i>t</i> -HB <sub>nc</sub> |
| NH-*-O in U-U ( $C_1$ : <b>40</b> ) | 131.4                   | 131.5                   | -0.1                      | 164.5                                   | 160.2                                   | 4.3                                       | <i>p</i> -CS/ <i>t</i> -HB <sub>nc</sub> |

<sup>a</sup> BSS-C': The 6-311+G(3df,3p) basis sets. <sup>b</sup>  $\Delta\theta_p = \theta_{p:CIV} - \theta_{p:POM}$ . <sup>c</sup>  $\Delta\kappa_p = \kappa_{p:CIV} - \kappa_{p:POM}$ .

**Table S10.**  $\Delta E_{\text{psi}} (= E_{\text{psi}} - E_{\text{o}})$  for A-T, C-G, A-A, T-T and U-U, calculated with M06-2X/BSS-C'.<sup>a</sup>

| $w$                   | $\Delta r$<br>(Å) | $\Delta E_{\text{ES:CIV};(j=1)}$<br>(kJ mol <sup>-1</sup> ) | $\Delta E_{\text{ES:POM};(j=1)}$<br>(kJ mol <sup>-1</sup> ) | $\Delta E_{\text{ES:CIV};(j=2)}$<br>(kJ mol <sup>-1</sup> ) | $\Delta E_{\text{ES:POM};(j=2)}$<br>(kJ mol <sup>-1</sup> ) | $\Delta E_{\text{ES:CIV};(j=3)}$<br>(kJ mol <sup>-1</sup> ) | $\Delta E_{\text{ES:POM};(j=3)}$<br>(kJ mol <sup>-1</sup> ) |
|-----------------------|-------------------|-------------------------------------------------------------|-------------------------------------------------------------|-------------------------------------------------------------|-------------------------------------------------------------|-------------------------------------------------------------|-------------------------------------------------------------|
| A-T (C <sub>1</sub> ) |                   |                                                             |                                                             |                                                             |                                                             |                                                             |                                                             |
| -0.18897              | -0.10000          |                                                             | 0.58286                                                     |                                                             | 0.90317                                                     |                                                             | 0.16278                                                     |
| -0.10000              | -0.05292          | 0.15228                                                     |                                                             | 0.23735                                                     |                                                             | 0.04437                                                     |                                                             |
| -0.09449              | -0.05000          |                                                             | 0.13653                                                     |                                                             | 0.20479                                                     |                                                             | 0.03676                                                     |
| -0.05000              | -0.02646          | 0.03649                                                     |                                                             | 0.05592                                                     |                                                             | 0.01050                                                     |                                                             |
| -0.02500              | -0.01323          | 0.00893                                                     |                                                             | 0.01365                                                     |                                                             | 0.00263                                                     |                                                             |
| 0.00000               | 0.00000           | 0.00000                                                     | 0.00000                                                     | 0.00000                                                     | 0.00000                                                     | 0.00000                                                     | 0.00000                                                     |
| 0.02500               | 0.01323           | 0.00866                                                     |                                                             | 0.01260                                                     |                                                             | 0.00236                                                     |                                                             |
| 0.05000               | 0.02646           | 0.03413                                                     |                                                             | 0.04883                                                     |                                                             | 0.00945                                                     |                                                             |
| 0.09449               | 0.05000           |                                                             | 0.11552                                                     |                                                             | 0.16541                                                     |                                                             | 0.03413                                                     |
| 0.10000               | 0.05292           | 0.13285                                                     |                                                             | 0.18457                                                     |                                                             | 0.03649                                                     |                                                             |
| 0.18897               | 0.10000           |                                                             | 0.44371                                                     |                                                             | 0.60912                                                     |                                                             | 0.12602                                                     |
| 0.20000               | 0.10584           | 0.50593                                                     |                                                             | 0.68841                                                     |                                                             | 0.13968                                                     |                                                             |
| 0.30000               | 0.15875           | 1.08302                                                     |                                                             | 1.50651                                                     |                                                             | 0.31480                                                     |                                                             |
| 0.37794               | 0.20000           |                                                             | 1.57793                                                     |                                                             | 2.19229                                                     |                                                             | 0.48834                                                     |
| 0.40000               | 0.21167           | 1.83732                                                     |                                                             | 2.60187                                                     |                                                             | 0.57498                                                     |                                                             |
| 0.50000               | 0.26459           | 2.75625                                                     |                                                             | 3.97606                                                     |                                                             | 0.91682                                                     |                                                             |
| 0.56691               | 0.30000           |                                                             | 3.12697                                                     |                                                             | 4.38984                                                     |                                                             | 1.07645                                                     |
| 0.60000               | 0.31751           | 3.84006                                                     |                                                             | 5.62067                                                     |                                                             | 1.33402                                                     |                                                             |
| 0.70000               | 0.37043           | 5.09793                                                     |                                                             | 7.55330                                                     |                                                             | 1.84415                                                     |                                                             |
| 0.75589               | 0.40000           |                                                             | 4.87293                                                     |                                                             | 7.00221                                                     |                                                             | 1.83522                                                     |
| 0.80000               | 0.42334           | 6.56428                                                     |                                                             | 9.78078                                                     |                                                             | 2.46246                                                     |                                                             |
| 0.90000               | 0.47626           | 8.28345                                                     |                                                             | 12.32042                                                    |                                                             | 3.19418                                                     |                                                             |
| 0.94486               | 0.50000           |                                                             | 6.71865                                                     |                                                             | 9.85613                                                     |                                                             | 2.76203                                                     |
| 1.00000               | 0.52918           | 10.29327                                                    |                                                             | 15.18379                                                    |                                                             | 4.05824                                                     |                                                             |
| C-G (C <sub>1</sub> ) |                   |                                                             |                                                             |                                                             |                                                             |                                                             |                                                             |
| -0.18897              | -0.10000          |                                                             | 0.86642                                                     |                                                             | 1.39677                                                     |                                                             | 0.82703                                                     |
| -0.10000              | -0.05292          | 0.23157                                                     |                                                             | 0.38674                                                     |                                                             | 0.22684                                                     |                                                             |
| -0.09449              | -0.05000          |                                                             | 0.05776                                                     |                                                             | 0.09714                                                     |                                                             | 0.05776                                                     |
| -0.05000              | -0.02646          | 0.05592                                                     |                                                             | 0.09583                                                     |                                                             | 0.05540                                                     |                                                             |
| -0.02500              | -0.01323          | 0.01365                                                     |                                                             | 0.02363                                                     |                                                             | 0.01365                                                     |                                                             |
| 0.00000               | 0.00000           | 0.00000                                                     | 0.00000                                                     | 0.00000                                                     | 0.00000                                                     | 0.00000                                                     | 0.00000                                                     |
| 0.02500               | 0.01323           | 0.01313                                                     |                                                             | 0.02337                                                     |                                                             | 0.01313                                                     |                                                             |
| 0.05000               | 0.02646           | 0.05198                                                     |                                                             | 0.09347                                                     |                                                             | 0.05225                                                     |                                                             |
| 0.09449               | 0.05000           |                                                             | 0.05251                                                     |                                                             | 0.09452                                                     |                                                             | 0.05251                                                     |
| 0.10000               | 0.05292           | 0.20138                                                     |                                                             | 0.36810                                                     |                                                             | 0.20269                                                     |                                                             |
| 0.18897               | 0.10000           |                                                             | 0.68263                                                     |                                                             | 1.27074                                                     |                                                             | 0.69313                                                     |
| 0.20000               | 0.10584           | 0.75903                                                     |                                                             | 1.42565                                                     |                                                             | 0.77951                                                     |                                                             |
| 0.30000               | 0.15875           | 1.61600                                                     |                                                             | 3.12933                                                     |                                                             | 1.70579                                                     |                                                             |
| 0.37794               | 0.20000           |                                                             | 2.43384                                                     |                                                             | 4.77316                                                     |                                                             | 2.57299                                                     |
| 0.40000               | 0.21167           | 2.72133                                                     |                                                             | 5.45605                                                     |                                                             | 2.92953                                                     |                                                             |
| 0.50000               | 0.26459           | 4.03618                                                     |                                                             | 8.36143                                                     |                                                             | 4.40506                                                     |                                                             |
| 0.56691               | 0.30000           |                                                             | 4.83355                                                     |                                                             | 8.93458                                                     |                                                             | 5.24575                                                     |
| 0.60000               | 0.31751           | 5.52930                                                     |                                                             | 11.79716                                                    |                                                             | 6.10140                                                     |                                                             |
| 0.70000               | 0.37043           | 7.17208                                                     |                                                             | 15.72569                                                    |                                                             | 7.98940                                                     |                                                             |
| 0.75589               | 0.40000           |                                                             | 7.69009                                                     |                                                             | 13.06974                                                    |                                                             | 8.39110                                                     |
| 0.80000               | 0.42334           | 8.94193                                                     |                                                             | 20.11422                                                    |                                                             | 10.04884                                                    |                                                             |
| 0.90000               | 0.47626           | 10.82940                                                    |                                                             | 24.92728                                                    |                                                             | 12.26502                                                    |                                                             |
| 0.94486               | 0.50000           |                                                             | 10.77505                                                    |                                                             | 16.88459                                                    |                                                             | 11.80162                                                    |
| 1.00000               | 0.52918           | 12.83318                                                    |                                                             | 30.13654                                                    |                                                             | 14.62036                                                    |                                                             |

Table S10. Continued.

| $w$           | $\Delta r$<br>(Å) | $\Delta E_{\text{ES:CIV};(j=1)}$<br>(kJ mol <sup>-1</sup> ) | $\Delta E_{\text{ES:POM};(j=1)}$<br>(kJ mol <sup>-1</sup> ) | $\Delta E_{\text{ES:CIV};(j=2)}$<br>(kJ mol <sup>-1</sup> ) | $\Delta E_{\text{ES:POM};(j=2)}$<br>(kJ mol <sup>-1</sup> ) | $\Delta E_{\text{ES:CIV};(j=3)}$<br>(kJ mol <sup>-1</sup> ) | $\Delta E_{\text{ES:POM};(j=3)}$<br>(kJ mol <sup>-1</sup> ) |
|---------------|-------------------|-------------------------------------------------------------|-------------------------------------------------------------|-------------------------------------------------------------|-------------------------------------------------------------|-------------------------------------------------------------|-------------------------------------------------------------|
| A-A ( $C_1$ ) |                   |                                                             |                                                             |                                                             |                                                             |                                                             |                                                             |
| -0.18897      | -0.10000          |                                                             | 0.51985                                                     |                                                             | 0.17328                                                     |                                                             |                                                             |
| -0.10000      | -0.05292          | 0.13495                                                     |                                                             | 0.05514                                                     |                                                             |                                                             |                                                             |
| -0.09449      | -0.05000          |                                                             | 0.12602                                                     |                                                             | 0.03676                                                     |                                                             |                                                             |
| -0.05000      | -0.02646          | 0.03177                                                     |                                                             | 0.01392                                                     |                                                             |                                                             |                                                             |
| -0.02500      | -0.01323          | 0.00735                                                     |                                                             | 0.00394                                                     |                                                             |                                                             |                                                             |
| 0.00000       | 0.00000           | 0.00000                                                     | 0.00000                                                     | 0.00000                                                     | 0.00000                                                     |                                                             |                                                             |
| 0.02500       | 0.01323           | 0.00893                                                     |                                                             | 0.00158                                                     |                                                             |                                                             |                                                             |
| 0.05000       | 0.02646           | 0.03439                                                     |                                                             | 0.00866                                                     |                                                             |                                                             |                                                             |
| 0.09449       | 0.05000           |                                                             | 0.10765                                                     |                                                             | 0.03938                                                     |                                                             |                                                             |
| 0.10000       | 0.05292           | 0.13154                                                     |                                                             | 0.03991                                                     |                                                             |                                                             |                                                             |
| 0.18897       | 0.10000           |                                                             | 0.42008                                                     |                                                             | 0.14703                                                     |                                                             |                                                             |
| 0.20000       | 0.10584           | 0.50147                                                     |                                                             | 0.18090                                                     |                                                             |                                                             |                                                             |
| 0.30000       | 0.15875           | 1.10061                                                     |                                                             | 0.44686                                                     |                                                             |                                                             |                                                             |
| 0.37794       | 0.20000           |                                                             | 1.52016                                                     |                                                             | 0.47259                                                     |                                                             |                                                             |
| 0.40000       | 0.21167           | 1.94838                                                     |                                                             | 0.88847                                                     |                                                             |                                                             |                                                             |
| 0.50000       | 0.26459           | 3.08759                                                     |                                                             | 1.59105                                                     |                                                             |                                                             |                                                             |
| 0.56691       | 0.30000           |                                                             | 3.03508                                                     |                                                             | 0.84541                                                     |                                                             |                                                             |
| 0.60000       | 0.31751           | 4.57677                                                     |                                                             | 2.66068                                                     |                                                             |                                                             |                                                             |
| 0.70000       | 0.37043           | 6.50730                                                     |                                                             | 4.20789                                                     |                                                             |                                                             |                                                             |
| 0.75589       | 0.40000           |                                                             | 4.74953                                                     |                                                             | 1.23399                                                     |                                                             |                                                             |
| 0.80000       | 0.42334           | 8.99680                                                     |                                                             | 6.33244                                                     |                                                             |                                                             |                                                             |
| 0.90000       | 0.47626           | 12.18232                                                    |                                                             | 9.15249                                                     |                                                             |                                                             |                                                             |
| 0.94486       | 0.50000           |                                                             | 6.51649                                                     |                                                             | 1.59630                                                     |                                                             |                                                             |
| 1.00000       | 0.52918           | 16.20616                                                    |                                                             | 12.80509                                                    |                                                             |                                                             |                                                             |
| T-T ( $C_1$ ) |                   |                                                             |                                                             |                                                             |                                                             |                                                             |                                                             |
| -0.18897      | -0.10000          |                                                             | 0.56973                                                     |                                                             |                                                             |                                                             |                                                             |
| -0.10000      | -0.05292          | 0.16908                                                     |                                                             |                                                             |                                                             |                                                             |                                                             |
| -0.09449      | -0.05000          |                                                             | 0.14965                                                     |                                                             |                                                             |                                                             |                                                             |
| -0.05000      | -0.02646          | 0.04122                                                     |                                                             |                                                             |                                                             |                                                             |                                                             |
| -0.02500      | -0.01323          | 0.01024                                                     |                                                             |                                                             |                                                             |                                                             |                                                             |
| 0.00000       | 0.00000           | 0.00000                                                     | 0.00000                                                     |                                                             |                                                             |                                                             |                                                             |
| 0.02500       | 0.01323           | 0.00998                                                     |                                                             |                                                             |                                                             |                                                             |                                                             |
| 0.05000       | 0.02646           | 0.03965                                                     |                                                             |                                                             |                                                             |                                                             |                                                             |
| 0.09449       | 0.05000           |                                                             | 0.13915                                                     |                                                             |                                                             |                                                             |                                                             |
| 0.10000       | 0.05292           | 0.15412                                                     |                                                             |                                                             |                                                             |                                                             |                                                             |
| 0.18897       | 0.10000           |                                                             | 0.51197                                                     |                                                             |                                                             |                                                             |                                                             |
| 0.20000       | 0.10584           | 0.57498                                                     |                                                             |                                                             |                                                             |                                                             |                                                             |
| 0.30000       | 0.15875           | 1.21561                                                     |                                                             |                                                             |                                                             |                                                             |                                                             |
| 0.37794       | 0.20000           |                                                             | 1.76959                                                     |                                                             |                                                             |                                                             |                                                             |
| 0.40000       | 0.21167           | 2.05603                                                     |                                                             |                                                             |                                                             |                                                             |                                                             |
| 0.50000       | 0.26459           | 3.08523                                                     |                                                             |                                                             |                                                             |                                                             |                                                             |
| 0.56691       | 0.30000           |                                                             | 3.48141                                                     |                                                             |                                                             |                                                             |                                                             |
| 0.60000       | 0.31751           | 4.32000                                                     |                                                             |                                                             |                                                             |                                                             |                                                             |
| 0.70000       | 0.37043           | 5.75956                                                     |                                                             |                                                             |                                                             |                                                             |                                                             |
| 0.75589       | 0.40000           |                                                             | 5.49255                                                     |                                                             |                                                             |                                                             |                                                             |
| 0.80000       | 0.42334           | 7.50158                                                     |                                                             |                                                             |                                                             |                                                             |                                                             |
| 0.90000       | 0.47626           | 9.55026                                                     |                                                             |                                                             |                                                             |                                                             |                                                             |
| 0.94486       | 0.50000           |                                                             | 7.63758                                                     |                                                             |                                                             |                                                             |                                                             |
| 1.00000       | 0.52918           | 11.95364                                                    |                                                             |                                                             |                                                             |                                                             |                                                             |

Table S10. Continued.

| $w$           | $\Delta r$<br>(Å) | $\Delta E_{\text{ES:CIV};(j=1)}$<br>(kJ mol <sup>-1</sup> ) | $\Delta E_{\text{ES:POM};(j=1)}$<br>(kJ mol <sup>-1</sup> ) | $\Delta E_{\text{ES:CIV};(j=2)}$<br>(kJ mol <sup>-1</sup> ) | $\Delta E_{\text{ES:POM};(j=2)}$<br>(kJ mol <sup>-1</sup> ) | $\Delta E_{\text{ES:CIV};(j=3)}$<br>(kJ mol <sup>-1</sup> ) | $\Delta E_{\text{ES:POM};(j=3)}$<br>(kJ mol <sup>-1</sup> ) |
|---------------|-------------------|-------------------------------------------------------------|-------------------------------------------------------------|-------------------------------------------------------------|-------------------------------------------------------------|-------------------------------------------------------------|-------------------------------------------------------------|
| U-U ( $C_1$ ) |                   |                                                             |                                                             |                                                             |                                                             |                                                             |                                                             |
| -0.18897      | -0.10000          |                                                             | 0.66688                                                     |                                                             |                                                             |                                                             |                                                             |
| -0.10000      | -0.05292          | 0.18221                                                     |                                                             |                                                             |                                                             |                                                             |                                                             |
| -0.09449      | -0.05000          |                                                             | 0.16016                                                     |                                                             |                                                             |                                                             |                                                             |
| -0.05000      | -0.02646          | 0.04463                                                     |                                                             |                                                             |                                                             |                                                             |                                                             |
| -0.02500      | -0.01323          | 0.01103                                                     |                                                             |                                                             |                                                             |                                                             |                                                             |
| 0.00000       | 0.00000           | 0.00000                                                     | 0.00000                                                     |                                                             |                                                             |                                                             |                                                             |
| 0.02500       | 0.01323           | 0.01103                                                     |                                                             |                                                             |                                                             |                                                             |                                                             |
| 0.05000       | 0.02646           | 0.04253                                                     |                                                             |                                                             |                                                             |                                                             |                                                             |
| 0.09449       | 0.05000           |                                                             | 0.14440                                                     |                                                             |                                                             |                                                             |                                                             |
| 0.10000       | 0.05292           | 0.16331                                                     |                                                             |                                                             |                                                             |                                                             |                                                             |
| 0.18897       | 0.10000           |                                                             | 0.53823                                                     |                                                             |                                                             |                                                             |                                                             |
| 0.20000       | 0.10584           | 0.60859                                                     |                                                             |                                                             |                                                             |                                                             |                                                             |
| 0.30000       | 0.15875           | 1.28571                                                     |                                                             |                                                             |                                                             |                                                             |                                                             |
| 0.37794       | 0.20000           |                                                             | 1.86936                                                     |                                                             |                                                             |                                                             |                                                             |
| 0.40000       | 0.21167           | 2.15790                                                     |                                                             |                                                             |                                                             |                                                             |                                                             |
| 0.50000       | 0.26459           | 3.20337                                                     |                                                             |                                                             |                                                             |                                                             |                                                             |
| 0.56691       | 0.30000           |                                                             | 3.64682                                                     |                                                             |                                                             |                                                             |                                                             |
| 0.60000       | 0.31751           | 4.42029                                                     |                                                             |                                                             |                                                             |                                                             |                                                             |
| 0.70000       | 0.37043           | 5.81995                                                     |                                                             |                                                             |                                                             |                                                             |                                                             |
| 0.75589       | 0.40000           |                                                             | 5.65795                                                     |                                                             |                                                             |                                                             |                                                             |
| 0.80000       | 0.42334           | 7.40811                                                     |                                                             |                                                             |                                                             |                                                             |                                                             |
| 0.90000       | 0.47626           | 9.19660                                                     |                                                             |                                                             |                                                             |                                                             |                                                             |
| 0.94486       | 0.50000           |                                                             | 7.74260                                                     |                                                             |                                                             |                                                             |                                                             |
| 1.00000       | 0.52918           | 11.21587                                                    |                                                             |                                                             |                                                             |                                                             |                                                             |

<sup>a</sup> BSS-C': The 6-311+G(3df,3p) basis sets.

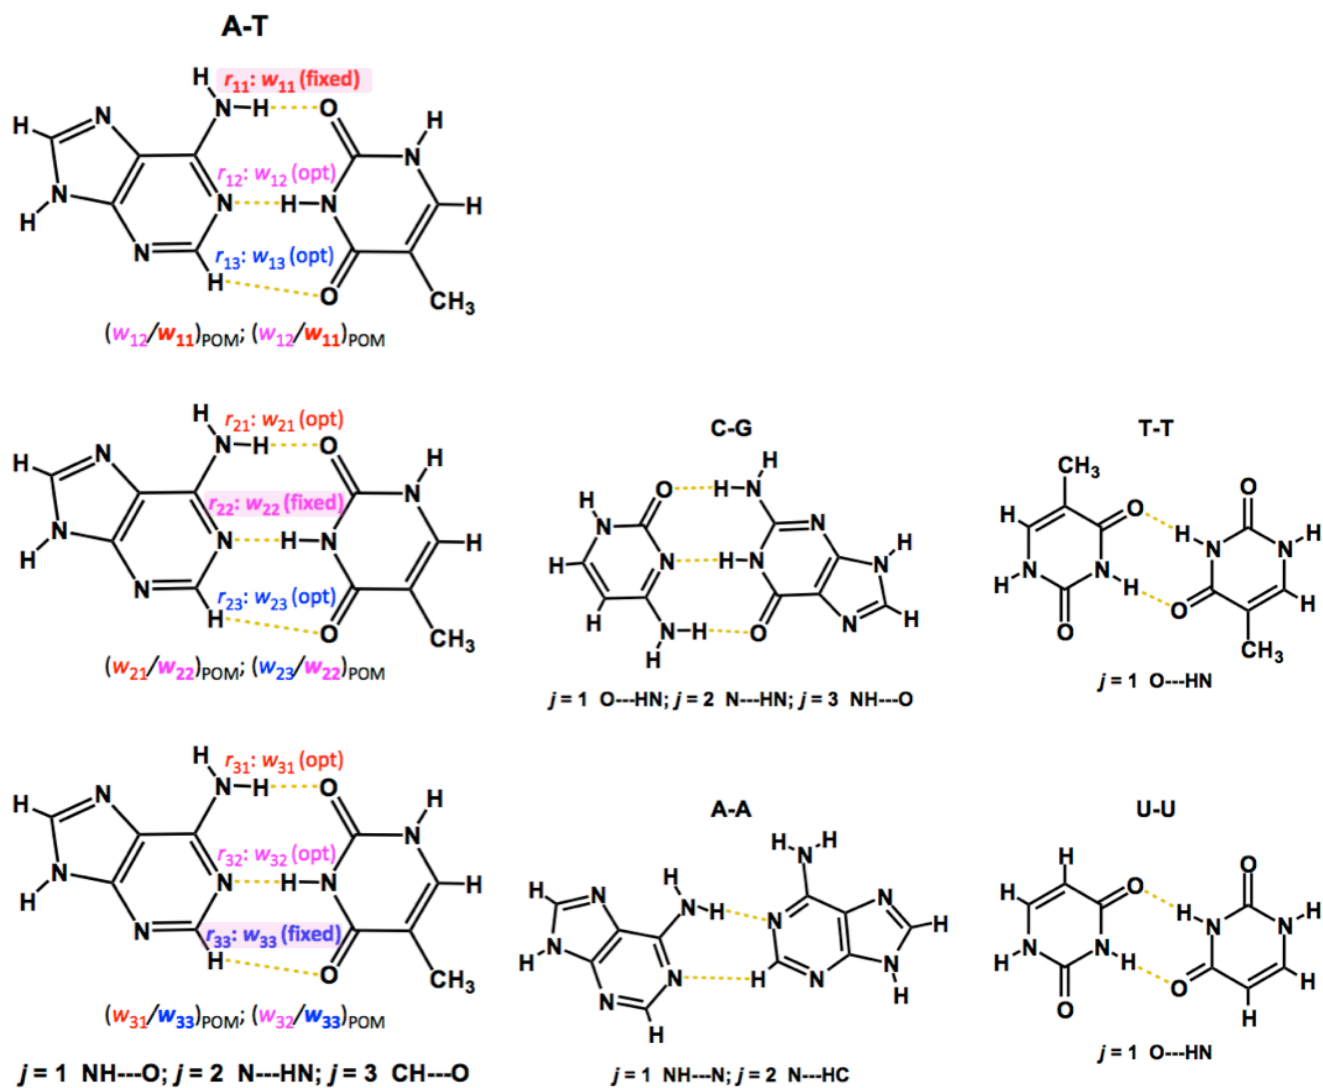

Scheme S1. Definition for  $j$  in  $w'_{ij}/w_i$ .

$$r_{i1} = r_{i1o} + w_{i1}a_o \quad (\text{S1})$$

$$r_{i2} = r_{i2o} + w_{i2}a_o \quad (\text{S2})$$

$$r_{i3} = r_{i3o} + w_{i3}a_o \quad (\text{S3})$$

$$(i = 1, 2 \text{ and } 3)$$

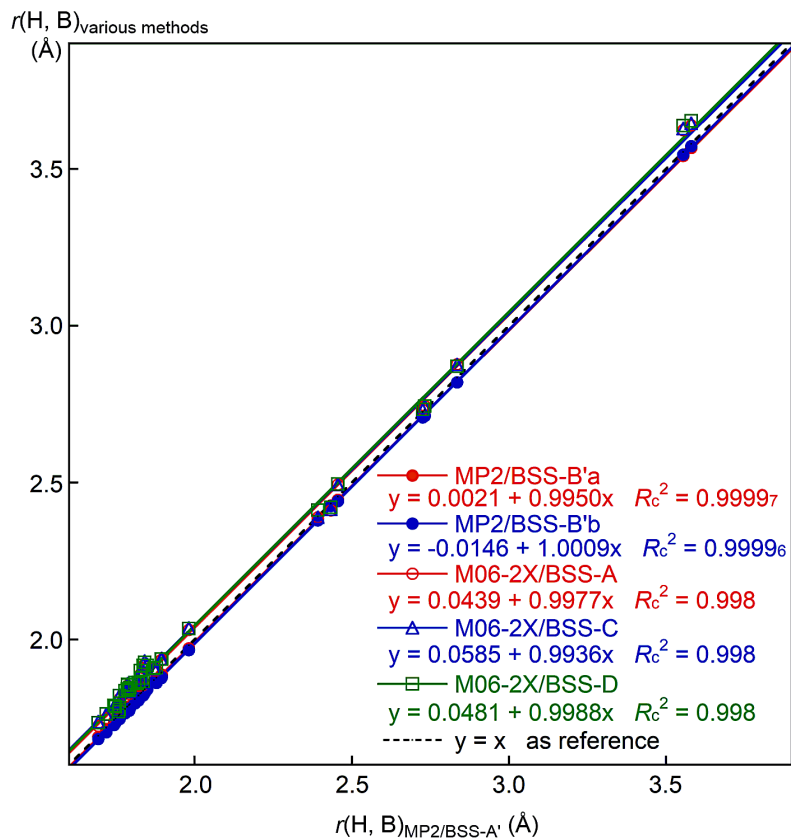

**Fig. S1** Plots of  $r(\text{H}, \text{B})$  for each HB in Nu-Nu' calculated with various methods ( $r(\text{H}, \text{B})_{\text{various methods}}$ ) versus those with MP2/BSS-A' ( $r(\text{H}, \text{B})_{\text{MP2/BSS-A}'}$ ).

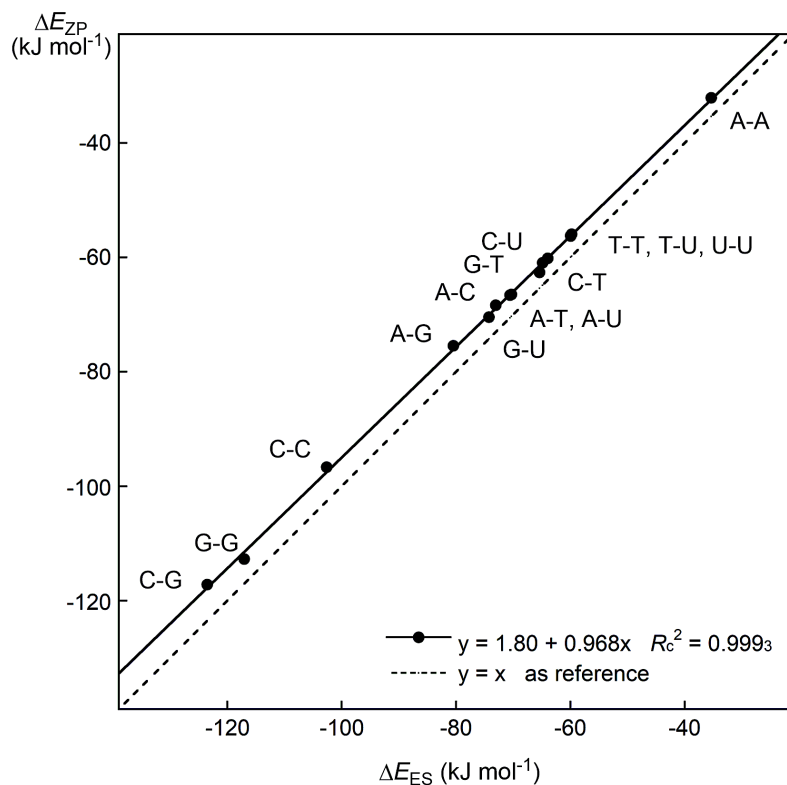

**Fig. S2** Plot of  $\Delta E_{\text{ZP}}$  versus  $\Delta E_{\text{ES}}$ , together with  $\Delta E_{\text{ES}}$  versus  $\Delta E_{\text{ES}}$ , calculated with MP2/BSS-B'a.

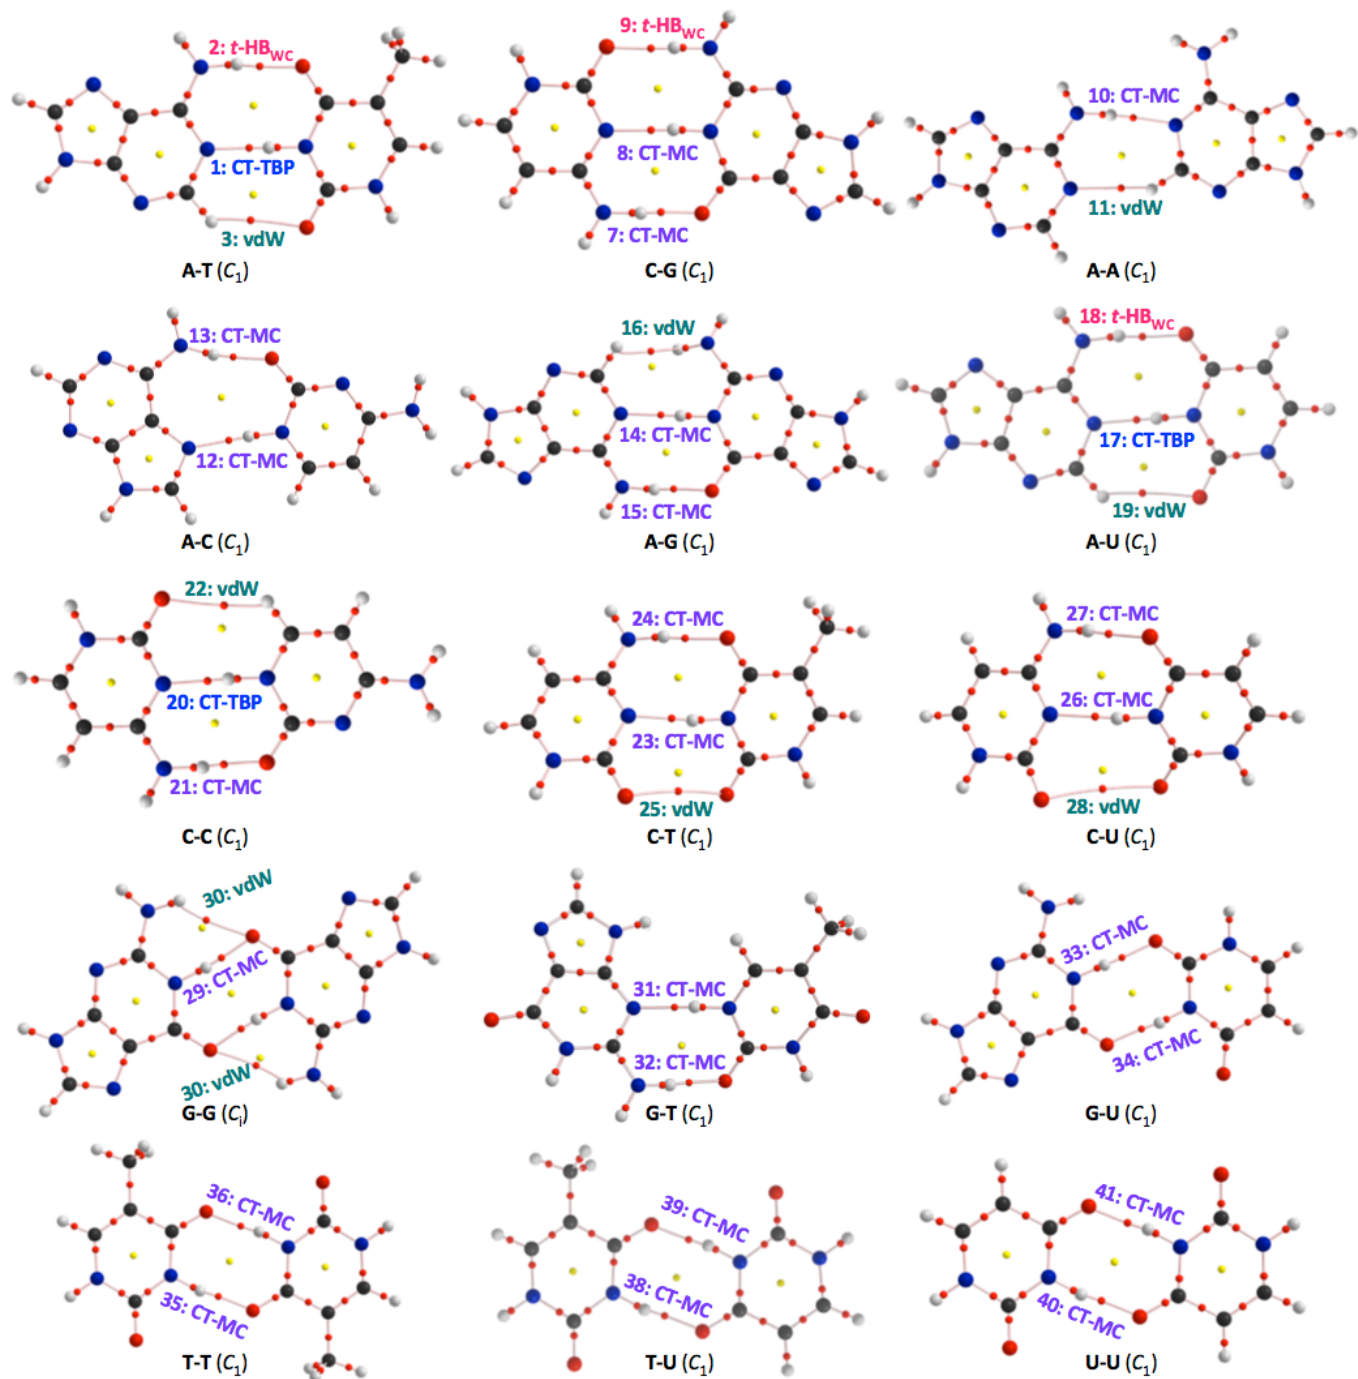

**Fig. S3** Molecular graphs for nucleobase pairs, with numbers and predicted natures, evaluated with MP2/BSS-B'a. BCPs (bond critical points) are denoted by red dots, RCPs (ring critical points) by yellow dots, and BPs (bond paths) are by pink lines. Oxygen, nitrogen, carbon and hydrogen atoms are in red, blue, black and grey, respectively.



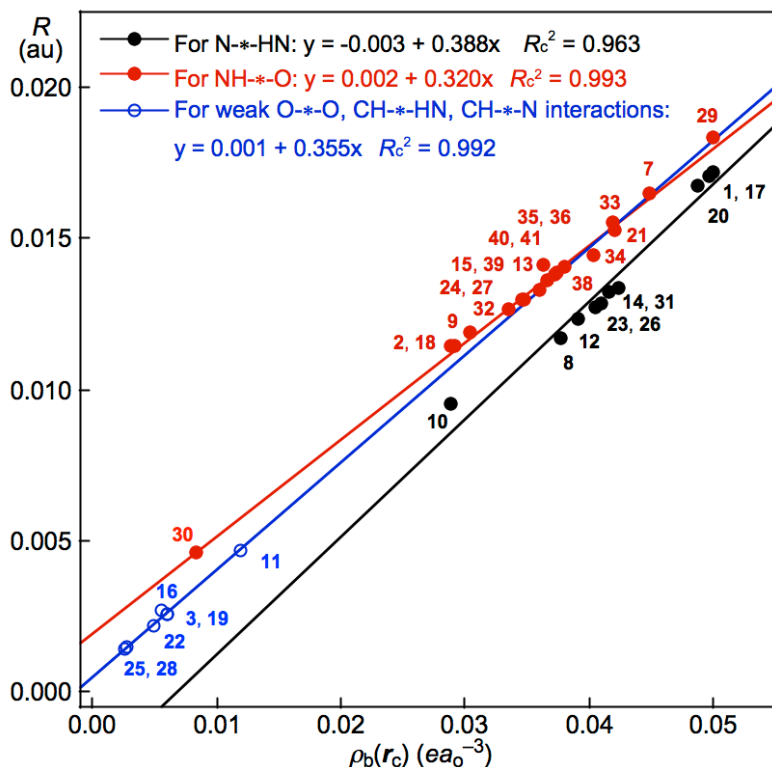

**Fig. S4** Plots of  $R$  versus  $\rho_b(r_c)$  for each HB in Nu-Nu', calculated with MP2/BSS-B'a. While data for G(A) of NH\*-N are shown by black solid circles, those for G(B) of NH\*-O are by red solid circles, together with those for G(C) of CH\*-X (X = O, N and HN) and O\*-O by blue hole circles. Numbers for the interactions are the same as those in Table 2 and Fig. 4 of the text, respectively.

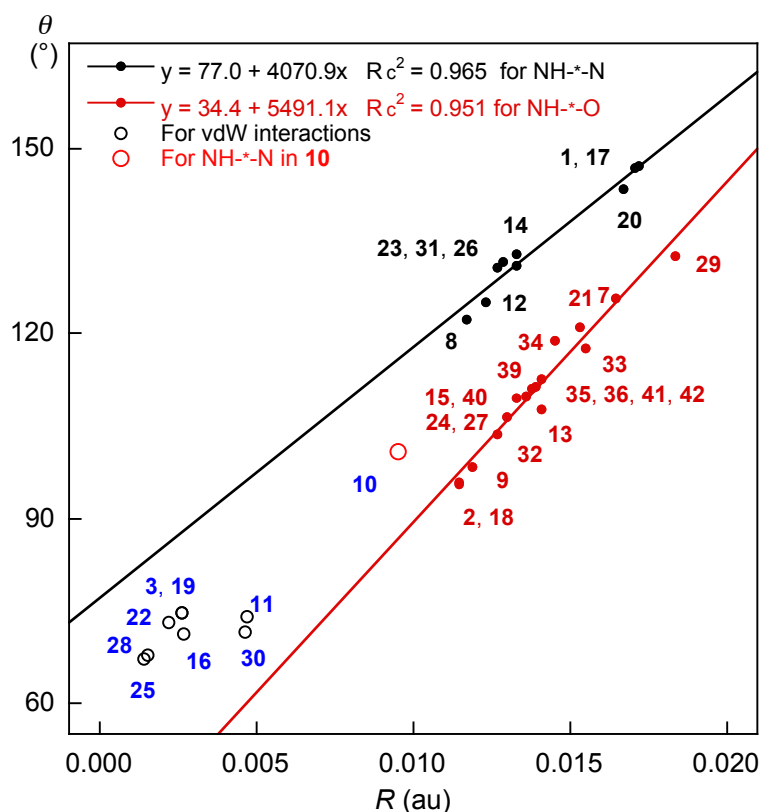

**Fig. S5** Plots of  $\theta$  versus  $R$  for Nu-Nu', calculated with MP2/BSS-B'a, black line for  $\theta$  versus  $R$  of N\*-HN (NH\*-N), CH\*-O, O\*-O and CH\*-HN, except for 10: NH\*-N, red line for  $\theta$  versus  $R$  of NH\*-O (O\*-HN) and CH\*-N, blue square digit for 10: NH\*-N.

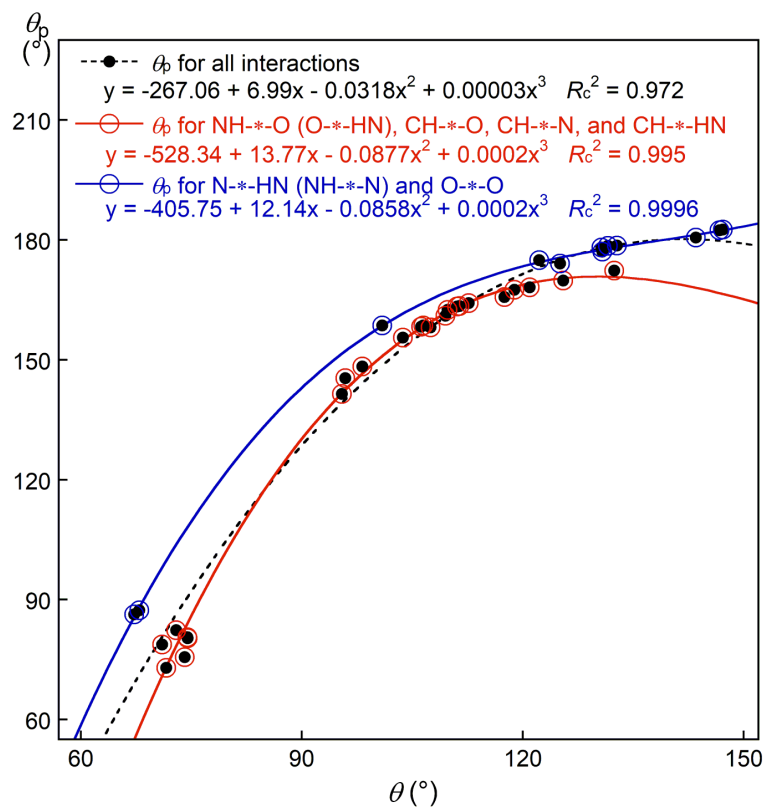

**Fig. S6** Plots of  $\theta_p$  versus  $\theta$  for Nu-Nu', calculated with MP2/BSS-B'a, black dot-line for  $\theta_p$  versus  $\theta$  of all interaction, red line for  $\theta_p$  versus  $\theta$  of NH\*-O (O\*-HN), CH\*-O, CH\*-N and CH\*-HN, blue line for  $\theta_p$  versus  $\theta$  of N\*-HN (NH\*-N) and O\*-O.

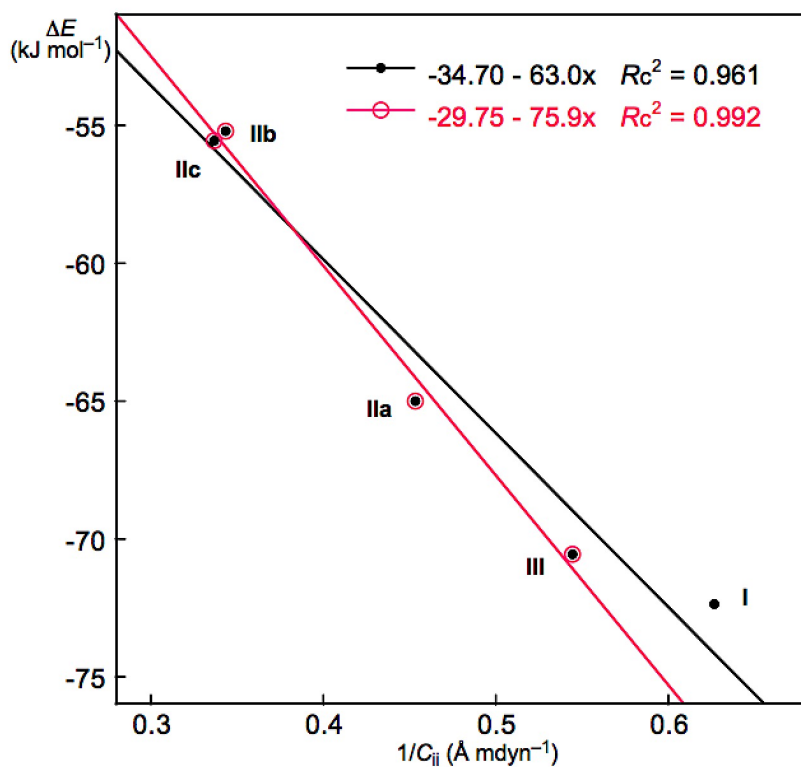

**Fig. S7** Plots of  $\Delta E$  versus  $(1/C_{ii})$  in acetic acid dimer and the related species, calculated with MP2/BSS-A. See Table S6 and Chart S1 for the data and the structures of I–III. The correlation becomes better, if the data of I, of which  $\Delta E$  value is largest in magnitude, is omitted from the correlation.

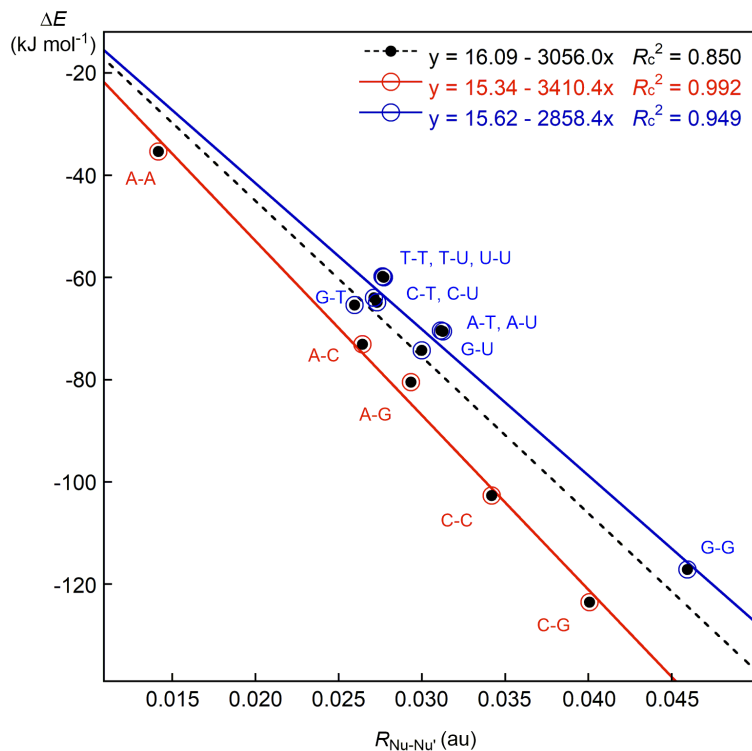

**Fig. S8** Plots of  $\Delta E$  versus  $R_{\text{Nu-Nu'}}$  in Nu-Nu', calculated with MP2/BSS-B'a.

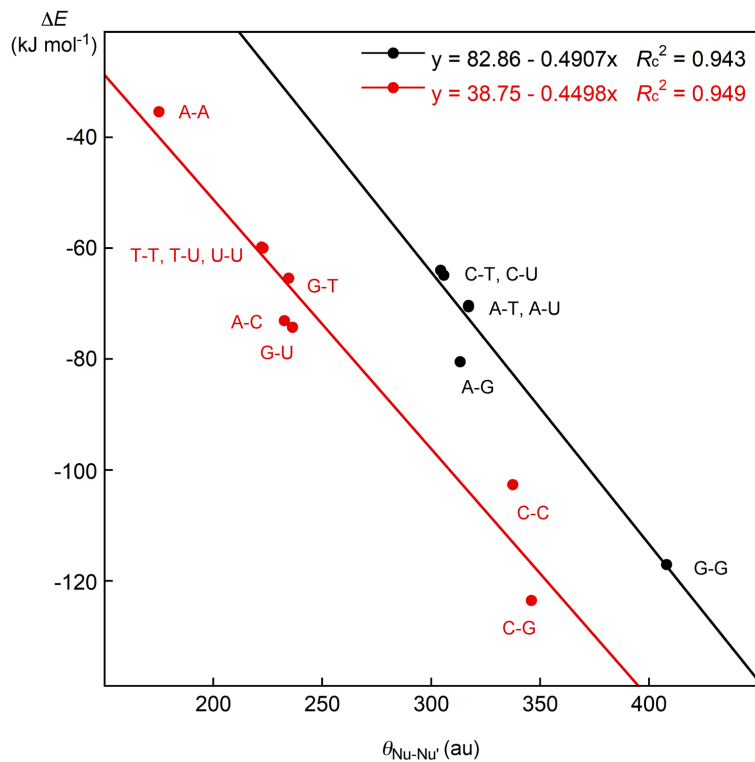

**Fig. S9** Plots of  $\Delta E$  versus  $\theta_{\text{Nu-Nu'}}$  in Nu-Nu', calculated with MP2/BSS-B'a.

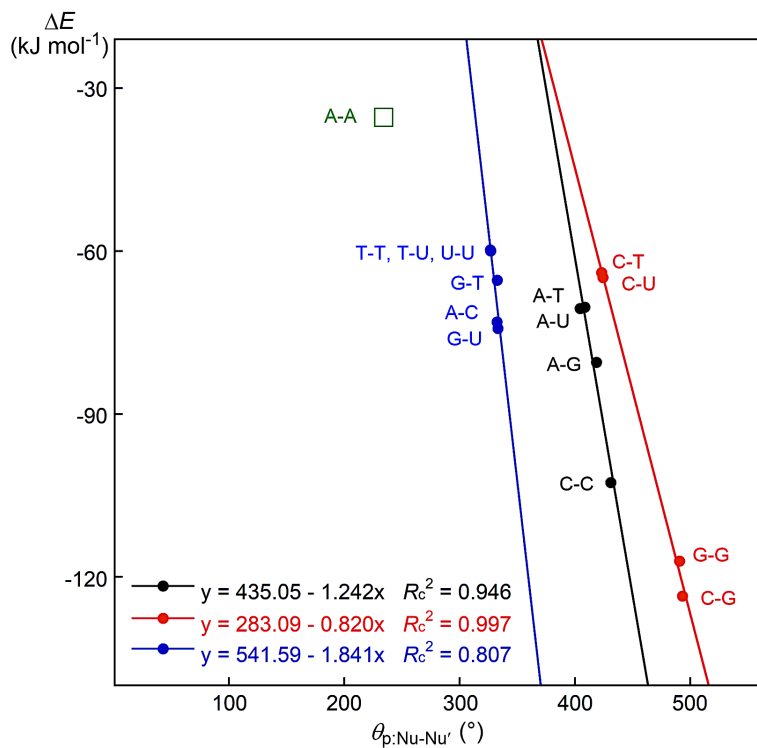

**Fig. S10** Plots of  $\Delta E$  versus  $\theta_{p:\text{Nu-Nu}'}$  for Nu-Nu', calculated with MP2/BSS-B'a.

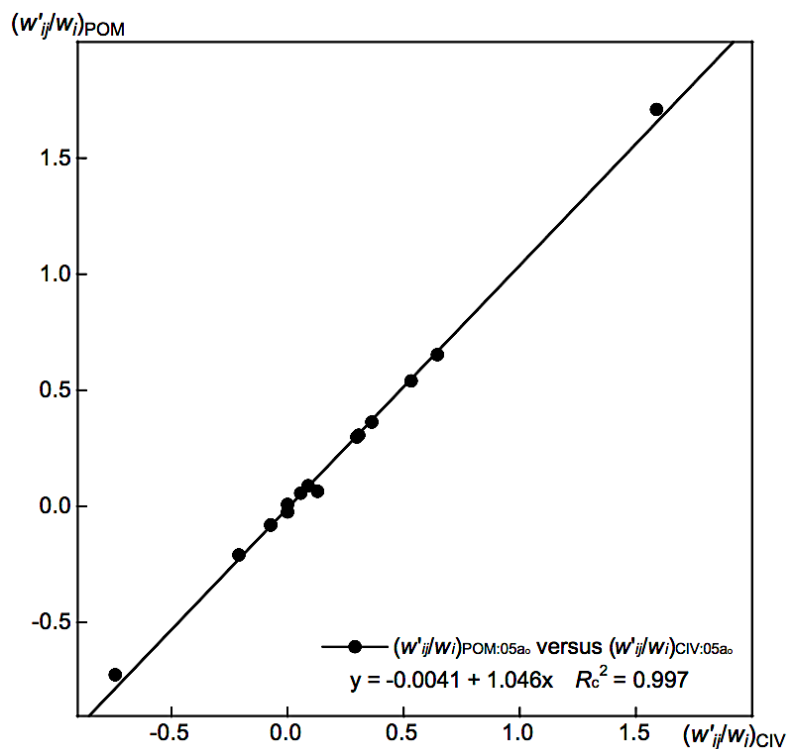

**Fig. S11** Plot of  $(w'_{ij}/w_i)_{\text{POM}}$  versus  $(w'_{ij}/w_i)_{\text{CIV}}$  for each HB of multi-HB system in A-T, C-G, A-A, T-T and U-U, calculated with M06-2X/BSS-C'.

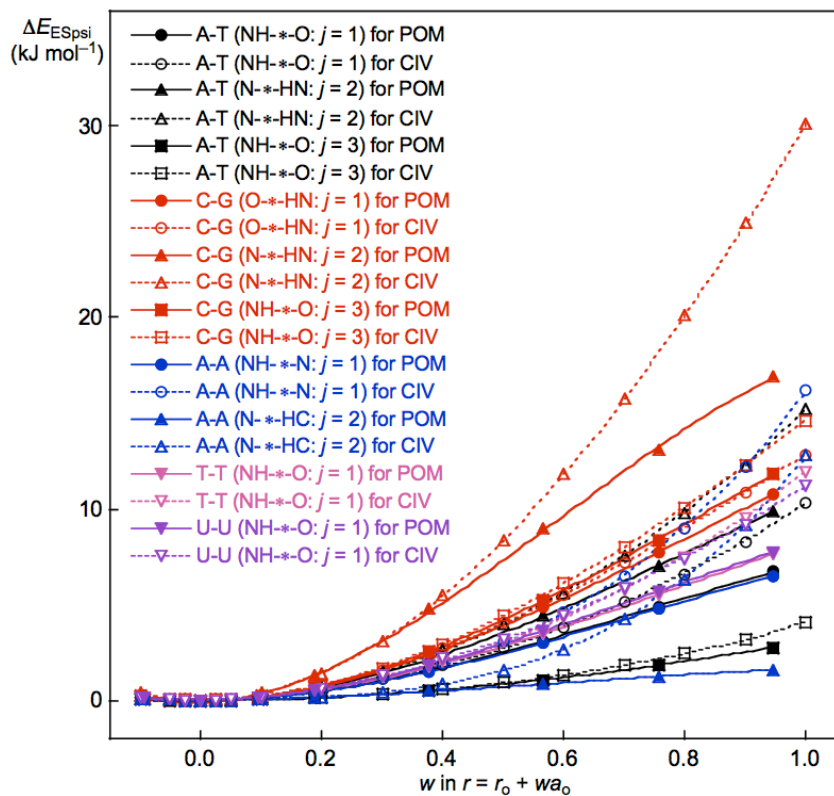

**Fig. S12** Plots of  $\Delta E_{ESpsi}$  versus  $w_{ii}$  in  $r = r_o + w_{ii}a_o$  for each HB in A-T, C-G, A-A, T-T and U-U calculated with CIV and POM of ModRedundant under M06-2X/BSS-C'.

## Optimized structures given by Cartesian coordinates

Optimized structures given by Cartesian coordinates for examined molecules, together with the total energies with MP2/6-311+G(3df,3pd) method of the Gaussian 09 program, except for C of which calculations being performed with 6-311+G(3d). The optimized structures were confirmed by the frequency analysis.

MP2/BSS-B'a

Adduct Adenine-Thymine (A-T)

Symmetry  $C_1$

energy MP2 = -919.708785 au

Standard orientation

|   |   |           |           |           |
|---|---|-----------|-----------|-----------|
| 7 | 0 | -0.954261 | 0.379387  | 0.000000  |
| 6 | 0 | -1.563985 | 1.583534  | -0.000003 |
| 7 | 0 | -2.869053 | 1.832451  | -0.000003 |
| 6 | 0 | -3.579511 | 0.699255  | 0.000000  |
| 6 | 0 | -3.085775 | -0.609960 | 0.000003  |
| 6 | 0 | -1.680295 | -0.749020 | 0.000004  |
| 7 | 0 | -1.065488 | -1.938158 | 0.000008  |
| 7 | 0 | -4.942944 | 0.545718  | 0.000000  |
| 6 | 0 | -5.196454 | -0.798114 | 0.000004  |
| 7 | 0 | -4.099539 | -1.535285 | 0.000005  |
| 1 | 0 | -0.894510 | 2.431662  | -0.000005 |
| 1 | 0 | -1.628754 | -2.769727 | 0.000012  |
| 1 | 0 | -0.048553 | -1.992924 | 0.000010  |
| 1 | 0 | -6.199405 | -1.184799 | 0.000005  |
| 1 | 0 | -5.618248 | 1.291992  | -0.000001 |
| 1 | 0 | 0.798446  | 0.386080  | -0.000001 |
| 7 | 0 | 1.845719  | 0.391873  | -0.000002 |
| 7 | 0 | 3.813567  | 1.588918  | -0.000009 |
| 6 | 0 | 2.431863  | 1.635088  | -0.000008 |
| 8 | 0 | 1.807852  | 2.680713  | -0.000012 |
| 6 | 0 | 2.482331  | -0.832136 | 0.000002  |
| 8 | 0 | 1.834213  | -1.880318 | 0.000006  |
| 6 | 0 | 3.940876  | -0.793547 | 0.000000  |
| 6 | 0 | 4.690621  | -2.088765 | 0.000006  |
| 6 | 0 | 4.536573  | 0.424455  | -0.000005 |
| 1 | 0 | 4.272308  | 2.484722  | -0.000014 |
| 1 | 0 | 5.762882  | -1.914133 | 0.000004  |
| 1 | 0 | 4.428547  | -2.678224 | 0.874567  |
| 1 | 0 | 4.428545  | -2.678232 | -0.874549 |
| 1 | 0 | 5.608747  | 0.541356  | -0.000007 |

MP2/BSS-B'a

Adduct Adenine-Thymine (A-T)

Symmetry  $C_s$

energy MP2 = -919.708785 au

Standard orientation

|   |   |           |           |          |
|---|---|-----------|-----------|----------|
| 7 | 0 | -0.756957 | -0.693929 | 0.000000 |
| 6 | 0 | -2.106449 | -0.718627 | 0.000000 |
| 7 | 0 | -2.898698 | -1.785168 | 0.000000 |
| 6 | 0 | -2.187818 | -2.918099 | 0.000000 |
| 6 | 0 | -0.794230 | -3.043560 | 0.000000 |
| 6 | 0 | -0.057169 | -1.838798 | 0.000000 |
| 7 | 0 | 1.281022  | -1.803002 | 0.000000 |

|   |   |           |           |           |
|---|---|-----------|-----------|-----------|
| 7 | 0 | -2.643155 | -4.212392 | 0.000000  |
| 6 | 0 | -1.543711 | -5.025645 | 0.000000  |
| 7 | 0 | -0.402529 | -4.359051 | 0.000000  |
| 1 | 0 | -2.578537 | 0.253303  | 0.000000  |
| 1 | 0 | 1.784429  | -2.672116 | 0.000000  |
| 1 | 0 | 1.773054  | -0.911342 | 0.000000  |
| 1 | 0 | -1.632220 | -6.096906 | 0.000000  |
| 1 | 0 | -3.608987 | -4.495458 | 0.000000  |
| 1 | 0 | 0.000000  | 0.886902  | 0.000000  |
| 7 | 0 | 0.450703  | 1.832249  | 0.000000  |
| 7 | 0 | 0.229760  | 4.124961  | 0.000000  |
| 6 | 0 | -0.413335 | 2.901166  | 0.000000  |
| 8 | 0 | -1.626335 | 2.794612  | 0.000000  |
| 6 | 0 | 1.829785  | 1.872497  | 0.000000  |
| 8 | 0 | 2.491252  | 0.832680  | 0.000000  |
| 6 | 0 | 2.430023  | 3.202363  | 0.000000  |
| 6 | 0 | 3.922459  | 3.313468  | 0.000000  |
| 6 | 0 | 1.592840  | 4.268903  | 0.000000  |
| 1 | 0 | -0.376985 | 4.927936  | 0.000000  |
| 1 | 0 | 4.232045  | 4.354812  | 0.000000  |
| 1 | 0 | 4.339042  | 2.820915  | 0.874559  |
| 1 | 0 | 4.339042  | 2.820915  | -0.874559 |
| 1 | 0 | 1.954373  | 5.285030  | 0.000000  |

MP2/BSS-B'a

Adduct Cytosine-Guanine (C-G)

Symmetry  $C_1$

energy MP2 = -935.765002 au

Standard orientation

|   |   |           |           |           |
|---|---|-----------|-----------|-----------|
| 7 | 0 | -4.639318 | 0.474202  | -0.050132 |
| 6 | 0 | -4.937707 | -0.865593 | -0.088426 |
| 7 | 0 | -3.863782 | -1.628242 | -0.071126 |
| 6 | 0 | -3.278110 | 0.583805  | -0.004052 |
| 7 | 0 | -2.573325 | 1.732031  | 0.045222  |
| 6 | 0 | -1.276117 | 1.515403  | 0.083989  |
| 7 | 0 | -0.414739 | 2.551188  | 0.183115  |
| 7 | 0 | -0.717360 | 0.264965  | 0.063505  |
| 6 | 0 | -1.404434 | -0.948530 | 0.016323  |
| 8 | 0 | -0.785002 | -2.017060 | 0.007807  |
| 6 | 0 | -2.820121 | -0.736859 | -0.018633 |
| 1 | 0 | -5.285505 | 1.245410  | -0.050688 |
| 1 | 0 | -5.951645 | -1.219250 | -0.128123 |
| 1 | 0 | -0.814871 | 3.463076  | 0.055082  |
| 1 | 0 | 0.585457  | 2.426283  | 0.037187  |
| 1 | 0 | 0.311990  | 0.184561  | 0.065571  |
| 7 | 0 | 2.160545  | -0.072176 | -0.006947 |
| 6 | 0 | 2.906207  | 1.060467  | -0.073822 |
| 7 | 0 | 4.294558  | 0.910121  | -0.084204 |
| 8 | 0 | 2.432630  | 2.195022  | -0.125329 |
| 6 | 0 | 2.734316  | -1.273292 | 0.037373  |
| 7 | 0 | 1.939070  | -2.338835 | 0.090585  |
| 6 | 0 | 4.165033  | -1.431728 | 0.029366  |
| 6 | 0 | 4.907788  | -0.297642 | -0.032987 |
| 1 | 0 | 4.824721  | 1.765506  | -0.132487 |
| 1 | 0 | 0.911571  | -2.225021 | 0.069158  |
| 1 | 0 | 2.341041  | -3.258184 | 0.116965  |
| 1 | 0 | 4.630473  | -2.400008 | 0.068650  |
| 1 | 0 | 5.985070  | -0.295035 | -0.046064 |

## MP2/BSS-B'a

Adduct Adenine-Adenine (A-A)

Symmetry  $C_1$ 

energy MP2 = -932.821002 au

Standard orientation

|   |   |           |           |           |
|---|---|-----------|-----------|-----------|
| 7 | 0 | -1.788124 | -0.992480 | 0.401771  |
| 6 | 0 | -2.700097 | -1.981461 | 0.450132  |
| 7 | 0 | -4.017743 | -1.907098 | 0.264450  |
| 6 | 0 | -4.395377 | -0.653599 | -0.001001 |
| 6 | 0 | -3.570659 | 0.473258  | -0.083554 |
| 6 | 0 | -2.192329 | 0.257157  | 0.138842  |
| 7 | 0 | -1.298683 | 1.260585  | 0.108658  |
| 7 | 0 | -5.655724 | -0.171034 | -0.255299 |
| 6 | 0 | -5.533974 | 1.173638  | -0.472672 |
| 7 | 0 | -4.288949 | 1.606758  | -0.378490 |
| 1 | 0 | -2.305281 | -2.962970 | 0.667674  |
| 1 | 0 | -1.618899 | 2.162331  | -0.198549 |
| 1 | 0 | -0.300752 | 1.061017  | 0.172953  |
| 1 | 0 | -6.386143 | 1.789692  | -0.696046 |
| 1 | 0 | -6.501511 | -0.715734 | -0.276319 |
| 1 | 0 | 0.613419  | -1.314083 | 0.070385  |
| 7 | 0 | 1.585811  | 0.489197  | 0.232751  |
| 6 | 0 | 1.588198  | -0.849128 | 0.035131  |
| 7 | 0 | 2.640831  | -1.632874 | -0.185332 |
| 6 | 0 | 3.779887  | -0.938340 | -0.194222 |
| 6 | 0 | 3.926039  | 0.441223  | -0.002439 |
| 6 | 0 | 2.737316  | 1.161241  | 0.220780  |
| 7 | 0 | 2.734326  | 2.508806  | 0.384176  |
| 7 | 0 | 5.062553  | -1.391168 | -0.375140 |
| 6 | 0 | 5.888228  | -0.304976 | -0.283894 |
| 7 | 0 | 5.242820  | 0.825839  | -0.057572 |
| 1 | 0 | 3.617740  | 2.950675  | 0.575810  |
| 1 | 0 | 1.912409  | 2.921074  | 0.791622  |
| 1 | 0 | 6.954185  | -0.394773 | -0.389994 |
| 1 | 0 | 5.331628  | -2.347021 | -0.539957 |

## MP2/BSS-B'a

Adduct Adenine-Cytosine (A-C)

Symmetry  $C_1$ 

energy MP2 = -860.609707 au

Standard orientation

|   |   |           |           |           |
|---|---|-----------|-----------|-----------|
| 1 | 0 | -0.327809 | -1.879665 | -0.011674 |
| 7 | 0 | -3.583904 | -1.733546 | 0.023652  |
| 6 | 0 | -4.612367 | -0.873475 | 0.023528  |
| 7 | 0 | -4.579355 | 0.459978  | 0.010803  |
| 6 | 0 | -3.320934 | 0.901400  | -0.001626 |
| 6 | 0 | -2.147560 | 0.137159  | -0.001998 |
| 6 | 0 | -2.322901 | -1.271803 | 0.010160  |
| 7 | 0 | -1.314076 | -2.145192 | 0.010110  |
| 7 | 0 | -2.888247 | 2.206131  | -0.016592 |
| 6 | 0 | -1.529097 | 2.182997  | -0.024663 |
| 7 | 0 | -1.036444 | 0.952843  | -0.016127 |
| 1 | 0 | -5.593628 | -1.324372 | 0.034815  |
| 1 | 0 | -1.560146 | -3.120375 | 0.013892  |
| 1 | 0 | -0.942754 | 3.083854  | -0.037164 |
| 1 | 0 | -3.482426 | 3.018598  | -0.020945 |
| 8 | 0 | 1.452302  | -1.798081 | -0.045597 |
| 7 | 0 | 1.792708  | 0.439975  | -0.001919 |



|   |   |          |           |           |
|---|---|----------|-----------|-----------|
| 6 | 0 | 2.262878 | -0.873003 | -0.024160 |
| 7 | 0 | 3.615659 | -1.056895 | -0.015523 |
| 6 | 0 | 4.421235 | -0.016587 | 0.005385  |
| 7 | 0 | 5.755643 | -0.271375 | -0.032148 |
| 6 | 0 | 3.964693 | 1.339242  | 0.029019  |
| 6 | 0 | 2.612416 | 1.507360  | 0.025243  |
| 1 | 0 | 0.768943 | 0.572016  | -0.007160 |
| 1 | 0 | 6.031236 | -1.229184 | 0.105875  |
| 1 | 0 | 6.407870 | 0.446593  | 0.224327  |
| 1 | 0 | 4.637269 | 2.177790  | 0.040330  |
| 1 | 0 | 2.138967 | 2.476216  | 0.041356  |

MP2/BSS-B'a

Adduct Adenine-Guanine (A-G)

Symmetry  $C_1$

energy MP2 = -1007.974268 au

Standard orientation

|   |   |           |           |           |
|---|---|-----------|-----------|-----------|
| 7 | 0 | 5.307451  | 0.292382  | -0.174030 |
| 6 | 0 | 5.529171  | -1.044541 | 0.039602  |
| 7 | 0 | 4.414172  | -1.725494 | 0.213644  |
| 6 | 0 | 3.956789  | 0.486813  | -0.131762 |
| 7 | 0 | 3.310816  | 1.661639  | -0.316534 |
| 6 | 0 | 2.014877  | 1.523426  | -0.205599 |
| 7 | 0 | 1.196785  | 2.626229  | -0.300297 |
| 7 | 0 | 1.383290  | 0.345421  | 0.054082  |
| 6 | 0 | 1.995792  | -0.905923 | 0.203652  |
| 8 | 0 | 1.313209  | -1.911796 | 0.386584  |
| 6 | 0 | 3.423967  | -0.782125 | 0.110606  |
| 1 | 0 | 5.996135  | 1.008914  | -0.332415 |
| 1 | 0 | 6.520481  | -1.458795 | 0.057286  |
| 1 | 0 | 1.664693  | 3.422969  | -0.702876 |
| 1 | 0 | 0.278191  | 2.456206  | -0.680186 |
| 1 | 0 | 0.352829  | 0.364869  | 0.181025  |
| 7 | 0 | -1.465998 | 0.428841  | 0.303833  |
| 6 | 0 | -2.162973 | 1.560347  | 0.541753  |
| 7 | 0 | -3.476243 | 1.747003  | 0.483651  |
| 6 | 0 | -4.108964 | 0.617962  | 0.142662  |
| 6 | 0 | -3.527843 | -0.626926 | -0.119718 |
| 6 | 0 | -2.119699 | -0.703952 | -0.018287 |
| 7 | 0 | -1.441176 | -1.833325 | -0.237974 |
| 7 | 0 | -5.454270 | 0.404359  | -0.013632 |
| 6 | 0 | -5.614707 | -0.911985 | -0.349394 |
| 7 | 0 | -4.473063 | -1.573300 | -0.423371 |
| 1 | 0 | -1.567768 | 2.417369  | 0.825117  |
| 1 | 0 | -1.972155 | -2.668696 | -0.415841 |
| 1 | 0 | -0.444702 | -1.900964 | -0.009020 |
| 1 | 0 | -6.586092 | -1.335868 | -0.528642 |
| 1 | 0 | -6.178087 | 1.093501  | 0.106188  |

MP2/BSS-B'a

Adduct Adenine-Uracil (A-U)

Symmetry  $C_1$

energy MP2 = -880.488228 au

Standard orientation

|   |   |           |           |           |
|---|---|-----------|-----------|-----------|
| 7 | 0 | -0.630964 | -0.291627 | -0.000008 |
| 6 | 0 | -1.131422 | -1.545255 | -0.000026 |
| 7 | 0 | -2.408987 | -1.909448 | -0.000037 |

|   |   |           |           |           |
|---|---|-----------|-----------|-----------|
| 6 | 0 | -3.217621 | -0.844020 | -0.000027 |
| 6 | 0 | -2.842252 | 0.503869  | -0.000008 |
| 6 | 0 | -1.454777 | 0.767739  | 0.000001  |
| 7 | 0 | -0.948942 | 2.006962  | 0.000018  |
| 7 | 0 | -4.589237 | -0.812406 | -0.000031 |
| 6 | 0 | -4.961240 | 0.503589  | -0.000018 |
| 7 | 0 | -3.934224 | 1.335352  | -0.000003 |
| 1 | 0 | -0.389395 | -2.330646 | -0.000032 |
| 1 | 0 | -1.584219 | 2.784932  | 0.000023  |
| 1 | 0 | 0.058693  | 2.152849  | 0.000022  |
| 1 | 0 | -5.994599 | 0.799554  | -0.000019 |
| 1 | 0 | -5.195539 | -1.615756 | -0.000042 |
| 1 | 0 | 1.113539  | -0.142995 | 0.000003  |
| 7 | 0 | 2.157815  | -0.056540 | 0.000009  |
| 7 | 0 | 4.226558  | -1.084908 | 0.000015  |
| 6 | 0 | 2.848501  | -1.243633 | 0.000006  |
| 8 | 0 | 2.319980  | -2.339329 | -0.000003 |
| 6 | 0 | 2.684896  | 1.222620  | 0.000021  |
| 8 | 0 | 1.945980  | 2.205650  | 0.000024  |
| 6 | 0 | 4.137168  | 1.285141  | 0.000030  |
| 6 | 0 | 4.846730  | 0.132744  | 0.000027  |
| 1 | 0 | 4.755879  | -1.940897 | 0.000013  |
| 1 | 0 | 4.619957  | 2.244251  | 0.000040  |
| 1 | 0 | 5.923983  | 0.109686  | 0.000034  |

MP2/BSS-B'a

Adduct Cytosine-Cytosine (C-C)

Symmetry  $C_1$

energy MP2 = -788.395311 au

Standard orientation

|   |   |           |           |           |
|---|---|-----------|-----------|-----------|
| 7 | 0 | -1.146017 | -0.227485 | -0.000288 |
| 6 | 0 | -1.805630 | 0.994024  | 0.001109  |
| 8 | 0 | -1.141103 | 2.038401  | 0.004160  |
| 7 | 0 | -3.168278 | 0.975406  | 0.004872  |
| 6 | 0 | -3.803527 | -0.179892 | -0.003705 |
| 7 | 0 | -5.164434 | -0.127763 | -0.047980 |
| 6 | 0 | -3.147497 | -1.447758 | -0.007761 |
| 6 | 0 | -1.783263 | -1.411240 | -0.003685 |
| 1 | 0 | -0.108353 | -0.197404 | 0.001973  |
| 1 | 0 | -5.574737 | 0.773002  | 0.133642  |
| 1 | 0 | -5.693661 | -0.938122 | 0.218013  |
| 1 | 0 | -3.687404 | -2.377323 | -0.021699 |
| 1 | 0 | -1.147221 | -2.282983 | -0.004798 |
| 7 | 0 | 1.643041  | -0.071092 | 0.003734  |
| 6 | 0 | 2.262694  | -1.284243 | 0.003597  |
| 7 | 0 | 3.665458  | -1.262969 | -0.000318 |
| 8 | 0 | 1.671345  | -2.355369 | 0.006588  |
| 6 | 0 | 2.323878  | 1.068625  | -0.000185 |
| 7 | 0 | 1.624326  | 2.203508  | 0.000012  |
| 6 | 0 | 3.763286  | 1.087735  | -0.004327 |
| 6 | 0 | 4.389608  | -0.117530 | -0.004254 |
| 1 | 0 | 4.114308  | -2.164843 | -0.000591 |
| 1 | 0 | 0.590969  | 2.170706  | 0.001654  |
| 1 | 0 | 2.102960  | 3.085365  | -0.004405 |
| 1 | 0 | 4.323261  | 2.005419  | -0.007463 |
| 1 | 0 | 5.461985  | -0.223634 | -0.007266 |

## MP2/BSS-B'a

Adduct Cytosine-Thymine (C-T)

Symmetry  $C_1$ 

energy MP2 = -847.480698 au

Standard orientation

|   |   |           |           |           |
|---|---|-----------|-----------|-----------|
| 7 | 0 | -2.978566 | 1.680608  | -0.446903 |
| 6 | 0 | -1.593887 | 1.609363  | -0.431806 |
| 8 | 0 | -0.888512 | 2.550931  | -0.724723 |
| 7 | 0 | -1.122467 | 0.366477  | -0.058393 |
| 6 | 0 | -1.872273 | -0.763218 | 0.192839  |
| 8 | 0 | -1.328136 | -1.845665 | 0.429559  |
| 6 | 0 | -3.320276 | -0.597715 | 0.159733  |
| 6 | 0 | -4.182916 | -1.781304 | 0.468233  |
| 6 | 0 | -3.803931 | 0.627592  | -0.160627 |
| 1 | 0 | -3.352796 | 2.577377  | -0.708757 |
| 1 | 0 | -0.093095 | 0.277250  | 0.056836  |
| 1 | 0 | -5.235006 | -1.517148 | 0.406890  |
| 1 | 0 | -3.981008 | -2.590628 | -0.228422 |
| 1 | 0 | -3.970981 | -2.156201 | 1.466034  |
| 1 | 0 | -4.861346 | 0.834212  | -0.212498 |
| 7 | 0 | 1.684107  | -0.098386 | 0.272449  |
| 6 | 0 | 2.491398  | 0.966938  | 0.581897  |
| 7 | 0 | 3.851270  | 0.828388  | 0.237195  |
| 8 | 0 | 2.112985  | 1.989483  | 1.120022  |
| 6 | 0 | 2.182116  | -1.208342 | -0.249231 |
| 7 | 0 | 1.329836  | -2.217350 | -0.483962 |
| 6 | 0 | 3.574845  | -1.355601 | -0.576061 |
| 6 | 0 | 4.374711  | -0.288945 | -0.314706 |
| 1 | 0 | 4.429532  | 1.623936  | 0.455830  |
| 1 | 0 | 0.368174  | -2.146983 | -0.142067 |
| 1 | 0 | 1.676331  | -3.094057 | -0.826156 |
| 1 | 0 | 3.969199  | -2.257201 | -1.008629 |
| 1 | 0 | 5.432314  | -0.279320 | -0.522247 |

## MP2/BSS-B'a

Adduct Cytosine-Uracil (C-U)

Symmetry  $C_1$ 

energy MP2 = -808.260401 au

Standard orientation

|   |   |           |           |           |
|---|---|-----------|-----------|-----------|
| 7 | 0 | 3.454521  | -1.118197 | -0.380667 |
| 6 | 0 | 2.066336  | -1.209948 | -0.404817 |
| 8 | 0 | 1.492794  | -2.216307 | -0.758966 |
| 7 | 0 | 1.436756  | -0.052539 | 0.004695  |
| 6 | 0 | 2.033994  | 1.152383  | 0.325062  |
| 8 | 0 | 1.352310  | 2.144617  | 0.586814  |
| 6 | 0 | 3.486229  | 1.143119  | 0.321889  |
| 6 | 0 | 4.136652  | 0.009530  | -0.029289 |
| 1 | 0 | 3.937503  | -1.953644 | -0.666302 |
| 1 | 0 | 0.400976  | -0.095611 | 0.089745  |
| 1 | 0 | 4.014464  | 2.038406  | 0.590356  |
| 1 | 0 | 5.211451  | -0.063435 | -0.056771 |
| 7 | 0 | -1.410632 | 0.046589  | 0.266745  |
| 6 | 0 | -2.081919 | -1.125973 | 0.504974  |
| 7 | 0 | -3.444834 | -1.138210 | 0.145848  |
| 8 | 0 | -1.583775 | -2.121929 | 0.993372  |
| 6 | 0 | -2.037679 | 1.113567  | -0.203322 |
| 7 | 0 | -1.315921 | 2.231875  | -0.368936 |
| 6 | 0 | -3.434405 | 1.104430  | -0.545727 |

|   |   |           |           |           |
|---|---|-----------|-----------|-----------|
| 6 | 0 | -4.097785 | -0.065694 | -0.354720 |
| 1 | 0 | -3.921742 | -2.009931 | 0.312407  |
| 1 | 0 | -0.357750 | 2.263610  | -0.012388 |
| 1 | 0 | -1.765811 | 3.076630  | -0.668597 |
| 1 | 0 | -3.933664 | 1.972600  | -0.936255 |
| 1 | 0 | -5.143836 | -0.194786 | -0.580057 |

MP2/BSS-B'a

Adduct Guanine-Guanine (G-G)

Symmetry  $C_i$

energy MP2 = -1083.124286 au

Standard orientation

|   |   |           |           |           |
|---|---|-----------|-----------|-----------|
| 7 | 0 | 4.555241  | 2.906066  | 0.017867  |
| 6 | 0 | 5.268101  | 1.732989  | 0.010055  |
| 7 | 0 | 4.496361  | 0.665712  | -0.018756 |
| 6 | 0 | 3.231306  | 2.574253  | -0.009808 |
| 7 | 0 | 2.191725  | 3.435206  | -0.011167 |
| 6 | 0 | 1.041138  | 2.806481  | -0.044137 |
| 7 | 0 | -0.128067 | 3.499099  | -0.111230 |
| 7 | 0 | 0.913770  | 1.447883  | -0.060791 |
| 6 | 0 | 1.950287  | 0.521683  | -0.050021 |
| 8 | 0 | 1.697202  | -0.692233 | -0.051227 |
| 6 | 0 | 3.221965  | 1.174455  | -0.032166 |
| 1 | 0 | 4.920948  | 3.843544  | 0.035469  |
| 1 | 0 | 6.342478  | 1.723199  | 0.026345  |
| 1 | 0 | -0.074682 | 4.473440  | 0.127767  |
| 1 | 0 | -0.987382 | 3.012745  | 0.094280  |
| 1 | 0 | -0.056484 | 1.079203  | -0.050107 |
| 8 | 0 | -1.697202 | 0.692233  | 0.051227  |
| 6 | 0 | -1.950287 | -0.521683 | 0.050021  |
| 7 | 0 | -4.555241 | -2.906066 | -0.017867 |
| 6 | 0 | -5.268101 | -1.732989 | -0.010055 |
| 7 | 0 | -4.496361 | -0.665712 | 0.018756  |
| 6 | 0 | -3.231306 | -2.574253 | 0.009808  |
| 7 | 0 | -2.191725 | -3.435206 | 0.011167  |
| 6 | 0 | -1.041138 | -2.806481 | 0.044137  |
| 7 | 0 | 0.128067  | -3.499099 | 0.111230  |
| 7 | 0 | -0.913770 | -1.447883 | 0.060791  |
| 6 | 0 | -3.221965 | -1.174455 | 0.032166  |
| 1 | 0 | -4.920948 | -3.843544 | -0.035469 |
| 1 | 0 | -6.342478 | -1.723199 | -0.026345 |
| 1 | 0 | 0.074682  | -4.473440 | -0.127767 |
| 1 | 0 | 0.987382  | -3.012745 | -0.094280 |
| 1 | 0 | 0.056484  | -1.079203 | 0.050107  |

MP2/BSS-B'a

Adduct Guanine-Thymine (G-T)

Symmetry  $C_1$

energy MP2 = -994.842973 au

Standard orientation

|   |   |           |           |           |
|---|---|-----------|-----------|-----------|
| 7 | 0 | -1.900110 | 2.032126  | -0.671355 |
| 6 | 0 | -3.097003 | 2.703800  | -0.598522 |
| 7 | 0 | -4.085548 | 1.933265  | -0.196219 |
| 6 | 0 | -2.142175 | 0.741072  | -0.295935 |
| 7 | 0 | -1.225615 | -0.260556 | -0.237340 |
| 6 | 0 | -1.749045 | -1.412327 | 0.128438  |
| 7 | 0 | -0.958182 | -2.501443 | 0.264468  |

|   |   |           |           |           |
|---|---|-----------|-----------|-----------|
| 7 | 0 | -3.074383 | -1.551414 | 0.425009  |
| 6 | 0 | -4.085236 | -0.545910 | 0.412029  |
| 8 | 0 | -5.222185 | -0.832472 | 0.721189  |
| 6 | 0 | -3.504888 | 0.705994  | -0.006319 |
| 1 | 0 | -1.022442 | 2.399090  | -0.999710 |
| 1 | 0 | -3.177947 | 3.745276  | -0.849806 |
| 1 | 0 | -0.031009 | -2.465694 | -0.164867 |
| 1 | 0 | -1.392687 | -3.405788 | 0.317464  |
| 1 | 0 | -3.418267 | -2.454594 | 0.720957  |
| 7 | 0 | 1.617462  | -0.111438 | -0.069684 |
| 6 | 0 | 2.264240  | -1.254557 | -0.438818 |
| 8 | 0 | 1.682192  | -2.280315 | -0.783797 |
| 7 | 0 | 3.633578  | -1.162817 | -0.389172 |
| 6 | 0 | 4.407810  | -0.064645 | 0.002817  |
| 8 | 0 | 5.624956  | -0.132204 | -0.003235 |
| 6 | 0 | 3.630008  | 1.104520  | 0.403558  |
| 6 | 0 | 4.371534  | 2.322596  | 0.857130  |
| 6 | 0 | 2.277612  | 1.016178  | 0.345733  |
| 1 | 0 | 0.585889  | -0.129529 | -0.129439 |
| 1 | 0 | 4.141088  | -1.994745 | -0.658074 |
| 1 | 0 | 3.681381  | 3.116439  | 1.128138  |
| 1 | 0 | 4.995038  | 2.088008  | 1.715739  |
| 1 | 0 | 5.031156  | 2.678958  | 0.070404  |
| 1 | 0 | 1.640534  | 1.838121  | 0.635322  |

MP2/BSS-B'a

Adduct Guanine-Uracil (G-U)

Symmetry C<sub>1</sub>

energy MP2 = -955.625708 au

Standard orientation

|   |   |           |           |           |
|---|---|-----------|-----------|-----------|
| 7 | 0 | -4.728759 | -0.438129 | -0.036134 |
| 6 | 0 | -4.520006 | -1.794484 | -0.042806 |
| 7 | 0 | -3.242035 | -2.114301 | -0.022014 |
| 6 | 0 | -3.500853 | 0.157529  | -0.007233 |
| 7 | 0 | -3.259835 | 1.489187  | 0.002919  |
| 6 | 0 | -1.977936 | 1.748685  | 0.035694  |
| 7 | 0 | -1.538466 | 3.043324  | 0.118316  |
| 7 | 0 | -1.004725 | 0.795650  | 0.045717  |
| 6 | 0 | -1.193182 | -0.590729 | 0.022692  |
| 8 | 0 | -0.220482 | -1.344058 | 0.021469  |
| 6 | 0 | -2.593092 | -0.906316 | 0.000923  |
| 1 | 0 | -5.611513 | 0.044949  | -0.045180 |
| 1 | 0 | -5.335993 | -2.493306 | -0.062950 |
| 1 | 0 | -2.224998 | 3.729822  | -0.145800 |
| 1 | 0 | -0.595737 | 3.228286  | -0.185614 |
| 1 | 0 | -0.023171 | 1.100937  | 0.051893  |
| 8 | 0 | 1.622552  | 1.668990  | -0.050067 |
| 6 | 0 | 2.566480  | 0.874655  | -0.033125 |
| 7 | 0 | 3.862654  | 1.330298  | -0.047045 |
| 7 | 0 | 2.432118  | -0.477756 | -0.000155 |
| 6 | 0 | 4.809716  | -0.840845 | 0.005469  |
| 6 | 0 | 4.955844  | 0.500237  | -0.027556 |
| 6 | 0 | 3.472119  | -1.426499 | 0.021680  |
| 8 | 0 | 3.226469  | -2.614811 | 0.050970  |
| 1 | 0 | 3.966404  | 2.330736  | -0.067102 |
| 1 | 0 | 1.461810  | -0.846323 | 0.010108  |
| 1 | 0 | 5.659028  | -1.498107 | 0.020530  |
| 1 | 0 | 5.914656  | 0.990729  | -0.040511 |

MP2/BSS-B'a  
Adduct Thymine-Thymine (T-T)  
Symmetry C<sub>1</sub>  
energy MP2 = -906.579293 au  
Standard orientation

|   |   |           |           |           |
|---|---|-----------|-----------|-----------|
| 7 | 0 | 4.015925  | 1.146546  | -0.000002 |
| 6 | 0 | 2.738262  | 1.677898  | -0.000003 |
| 8 | 0 | 2.524131  | 2.872592  | -0.000008 |
| 7 | 0 | 1.752782  | 0.711995  | -0.000002 |
| 6 | 0 | 1.928195  | -0.657822 | 0.000001  |
| 8 | 0 | 0.960875  | -1.421081 | 0.000001  |
| 6 | 0 | 3.307088  | -1.129628 | 0.000004  |
| 6 | 0 | 3.554832  | -2.605584 | 0.000007  |
| 6 | 0 | 4.289372  | -0.195693 | 0.000002  |
| 1 | 0 | 4.757614  | 1.826811  | -0.000004 |
| 1 | 0 | 0.778429  | 1.048474  | -0.000003 |
| 1 | 0 | 4.620367  | -2.817193 | 0.000008  |
| 1 | 0 | 3.102298  | -3.065835 | 0.874188  |
| 1 | 0 | 3.102299  | -3.065839 | -0.874172 |
| 1 | 0 | 5.335205  | -0.459133 | 0.000002  |
| 8 | 0 | -0.960869 | 1.421073  | 0.000002  |
| 6 | 0 | -1.928192 | 0.657817  | 0.000001  |
| 7 | 0 | -1.752783 | -0.712001 | -0.000002 |
| 7 | 0 | -4.015931 | -1.146540 | -0.000003 |
| 6 | 0 | -2.738270 | -1.677898 | -0.000004 |
| 8 | 0 | -2.524146 | -2.872593 | -0.000007 |
| 6 | 0 | -3.307082 | 1.129631  | 0.000003  |
| 6 | 0 | -3.554818 | 2.605587  | 0.000007  |
| 6 | 0 | -4.289372 | 0.195701  | 0.000001  |
| 1 | 0 | -4.757624 | -1.826800 | -0.000005 |
| 1 | 0 | -0.778432 | -1.048484 | -0.000002 |
| 1 | 0 | -4.620352 | 2.817202  | 0.000008  |
| 1 | 0 | -3.102282 | 3.065834  | 0.874189  |
| 1 | 0 | -3.102281 | 3.065839  | -0.874172 |
| 1 | 0 | -5.335204 | 0.459145  | 0.000001  |

MP2/BSS-B'a  
Adduct Thymine-Thymine (T-T)  
Symmetry C<sub>i</sub>  
energy MP2 = -906.579293 au  
Standard orientation

|   |   |           |           |           |
|---|---|-----------|-----------|-----------|
| 7 | 0 | -4.015964 | -1.146453 | 0.000012  |
| 6 | 0 | -2.738318 | -1.677844 | 0.000005  |
| 8 | 0 | -2.524228 | -2.872546 | 0.000000  |
| 7 | 0 | -1.752805 | -0.711976 | 0.000002  |
| 6 | 0 | -1.928186 | 0.657844  | -0.000002 |
| 8 | 0 | -0.960837 | 1.421071  | 0.000001  |
| 6 | 0 | -3.307066 | 1.129697  | 0.000010  |
| 6 | 0 | -3.554746 | 2.605663  | 0.000007  |
| 6 | 0 | -4.289379 | 0.195792  | 0.000021  |
| 1 | 0 | -4.757673 | -1.826696 | 0.000000  |
| 1 | 0 | -0.778457 | -1.048468 | -0.000001 |
| 1 | 0 | -4.620274 | 2.817298  | 0.000018  |
| 1 | 0 | -3.102167 | 3.065894  | 0.874180  |
| 1 | 0 | -3.102190 | 3.065881  | -0.874185 |
| 1 | 0 | -5.335206 | 0.459258  | 0.000045  |

|   |   |          |           |           |
|---|---|----------|-----------|-----------|
| 7 | 0 | 4.015964 | 1.146453  | -0.000012 |
| 6 | 0 | 2.738318 | 1.677844  | -0.000005 |
| 8 | 0 | 2.524228 | 2.872546  | 0.000000  |
| 7 | 0 | 1.752805 | 0.711976  | -0.000002 |
| 6 | 0 | 1.928186 | -0.657844 | 0.000002  |
| 8 | 0 | 0.960837 | -1.421071 | -0.000001 |
| 6 | 0 | 3.307066 | -1.129697 | -0.000010 |
| 6 | 0 | 3.554746 | -2.605663 | -0.000007 |
| 6 | 0 | 4.289379 | -0.195792 | -0.000021 |
| 1 | 0 | 4.757673 | 1.826696  | 0.000000  |
| 1 | 0 | 0.778457 | 1.048468  | 0.000001  |
| 1 | 0 | 4.620274 | -2.817298 | -0.000018 |
| 1 | 0 | 3.102190 | -3.065881 | 0.874185  |
| 1 | 0 | 3.102167 | -3.065894 | -0.874180 |
| 1 | 0 | 5.335206 | -0.459258 | -0.000045 |

MP2/BSS-B'a

Adduct Thymine-Uracil (T-U)

Symmetry  $C_1$

energy MP2 = -867.358642 au

Standard orientation

|   |   |           |           |           |
|---|---|-----------|-----------|-----------|
| 7 | 0 | 3.911513  | -0.902912 | -0.000005 |
| 6 | 0 | 2.702004  | -1.575208 | -0.000001 |
| 8 | 0 | 2.623854  | -2.786120 | -0.000005 |
| 7 | 0 | 1.613636  | -0.726225 | 0.000001  |
| 6 | 0 | 1.633803  | 0.654430  | 0.000001  |
| 8 | 0 | 0.586690  | 1.304334  | 0.000005  |
| 6 | 0 | 2.950508  | 1.278705  | -0.000001 |
| 6 | 0 | 3.030278  | 2.773207  | 0.000000  |
| 6 | 0 | 4.031846  | 0.461440  | -0.000004 |
| 1 | 0 | 4.725184  | -1.495226 | -0.000018 |
| 1 | 0 | 0.684114  | -1.170497 | 0.000004  |
| 1 | 0 | 4.065200  | 3.103444  | -0.000003 |
| 1 | 0 | 2.528841  | 3.179550  | -0.874216 |
| 1 | 0 | 2.528848  | 3.179549  | 0.874221  |
| 1 | 0 | 5.041273  | 0.841200  | -0.000007 |
| 8 | 0 | -1.012856 | -1.730906 | 0.000017  |
| 6 | 0 | -2.055421 | -1.079095 | 0.000009  |
| 7 | 0 | -2.027544 | 0.305394  | -0.000001 |
| 7 | 0 | -4.330297 | 0.504905  | -0.000006 |
| 6 | 0 | -3.107410 | 1.162574  | -0.000008 |
| 8 | 0 | -3.021762 | 2.372153  | -0.000016 |
| 6 | 0 | -3.382970 | -1.667276 | 0.000010  |
| 6 | 0 | -4.464111 | -0.854075 | 0.000004  |
| 1 | 0 | -5.135371 | 1.108813  | -0.000020 |
| 1 | 0 | -1.093961 | 0.743507  | -0.000001 |
| 1 | 0 | -3.478399 | -2.736618 | 0.000018  |
| 1 | 0 | -5.475465 | -1.225760 | 0.000005  |

MP2/BSS-B'a

Adduct Uracil-Uracil (U-U)

Symmetry  $C_1$

energy MP2 = -828.137946 au

Standard orientation

|   |   |          |          |           |
|---|---|----------|----------|-----------|
| 7 | 0 | 4.173591 | 0.304066 | -0.000025 |
| 6 | 0 | 3.022992 | 1.081394 | -0.000011 |
| 8 | 0 | 3.059027 | 2.293170 | 0.000005  |

|   |   |           |           |           |
|---|---|-----------|-----------|-----------|
| 7 | 0 | 1.862235  | 0.336588  | -0.000018 |
| 6 | 0 | 1.751406  | -1.043499 | -0.000039 |
| 8 | 0 | 0.648772  | -1.588064 | -0.000033 |
| 6 | 0 | 3.013012  | -1.761919 | -0.000046 |
| 6 | 0 | 4.170350  | -1.061328 | -0.000042 |
| 1 | 0 | 5.035201  | 0.824174  | -0.000021 |
| 1 | 0 | 0.978016  | 0.866215  | -0.000006 |
| 1 | 0 | 3.000535  | -2.835420 | -0.000055 |
| 1 | 0 | 5.139271  | -1.532681 | -0.000050 |
| 8 | 0 | -0.648771 | 1.588063  | 0.000012  |
| 6 | 0 | -1.751405 | 1.043499  | 0.000013  |
| 7 | 0 | -1.862234 | -0.336588 | 0.000006  |
| 7 | 0 | -4.173592 | -0.304066 | 0.000042  |
| 6 | 0 | -3.022992 | -1.081394 | 0.000019  |
| 8 | 0 | -3.059027 | -2.293170 | 0.000013  |
| 6 | 0 | -3.013013 | 1.761919  | 0.000045  |
| 6 | 0 | -4.170351 | 1.061327  | 0.000054  |
| 1 | 0 | -5.035201 | -0.824175 | 0.000053  |
| 1 | 0 | -0.978017 | -0.866216 | -0.000009 |
| 1 | 0 | -3.000536 | 2.835420  | 0.000058  |
| 1 | 0 | -5.139272 | 1.532681  | 0.000074  |

MP2/BSS-B'a

Adduct      Uracil-Uracil (U-U)

Symmetry       $C_s$

energy      MP2 = -828.137946 au

Standard orientation

|   |   |           |           |          |
|---|---|-----------|-----------|----------|
| 7 | 0 | 0.680045  | -4.129027 | 0.000000 |
| 6 | 0 | 1.350196  | -2.912876 | 0.000000 |
| 8 | 0 | 2.560270  | -2.839240 | 0.000000 |
| 7 | 0 | 0.503525  | -1.824191 | 0.000000 |
| 6 | 0 | -0.880934 | -1.838554 | 0.000000 |
| 8 | 0 | -1.522925 | -0.789650 | 0.000000 |
| 6 | 0 | -1.482381 | -3.159928 | 0.000000 |
| 6 | 0 | -0.680050 | -4.249206 | 0.000000 |
| 1 | 0 | 1.275899  | -4.940101 | 0.000000 |
| 1 | 0 | 0.951068  | -0.895724 | 0.000000 |
| 1 | 0 | -2.552616 | -3.244538 | 0.000000 |
| 1 | 0 | -1.061905 | -5.256762 | 0.000000 |
| 8 | 0 | 1.522930  | 0.789653  | 0.000000 |
| 6 | 0 | 0.880937  | 1.838557  | 0.000000 |
| 7 | 0 | -0.503521 | 1.824191  | 0.000000 |
| 7 | 0 | -0.680050 | 4.129026  | 0.000000 |
| 6 | 0 | -1.350196 | 2.912873  | 0.000000 |
| 8 | 0 | -2.560270 | 2.839232  | 0.000000 |
| 6 | 0 | 1.482380  | 3.159934  | 0.000000 |
| 6 | 0 | 0.680045  | 4.249209  | 0.000000 |
| 1 | 0 | -1.275907 | 4.940098  | 0.000000 |
| 1 | 0 | -0.951063 | 0.895722  | 0.000000 |
| 1 | 0 | 2.552614  | 3.244548  | 0.000000 |
| 1 | 0 | 1.061897  | 5.256766  | 0.000000 |



## Appendix

### QTAIM Dual Functional Analysis (QTAIM-DFA)

The bond critical point (BCP; \*) is an important concept in QTAIM. The BCP of  $(\omega, \sigma) = (3, -1)^{\text{SA1}}$  is a point along the bond path (BP) at the interatomic surface, where charge density  $\rho(\mathbf{r})$  reaches a minimum. It is denoted by  $\rho_b(\mathbf{r}_c)$ , so are other QTAIM functions, such as the total electron energy densities  $H_b(\mathbf{r}_c)$ , potential energy densities  $V_b(\mathbf{r}_c)$  and kinetic energy densities  $G_b(\mathbf{r}_c)$  at the BCPs. A chemical bond or interaction between A and B is denoted by A–B, which corresponds to the BP between A and B in QTAIM. We will use A-\*–B for BP, where the asterisk emphasizes the presence of a BCP in A–B.

The sign of the Laplacian  $\rho_b(\mathbf{r}_c)$  ( $\nabla^2\rho_b(\mathbf{r}_c)$ ) indicates that  $\rho_b(\mathbf{r}_c)$  is depleted or concentrated with respect to its surrounding, since  $\nabla^2\rho_b(\mathbf{r}_c)$  is the second derivative of  $\rho_b(\mathbf{r}_c)$ .  $\rho_b(\mathbf{r}_c)$  is locally depleted relative to the average distribution around  $\mathbf{r}_c$  if  $\nabla^2\rho_b(\mathbf{r}_c) > 0$ , but it is concentrated when  $\nabla^2\rho_b(\mathbf{r}_c) < 0$ . Total electron energy densities at BCPs ( $H_b(\mathbf{r}_c)$ ) must be a more appropriate measure for weak interactions on the energy basis.<sup>SA1–SA8</sup>  $H_b(\mathbf{r}_c)$  are the sum of kinetic energy densities ( $G_b(\mathbf{r}_c)$ ) and potential energy densities ( $V_b(\mathbf{r}_c)$ ) at BCPs, as shown in eqn (SA1). Electrons at BCPs are stabilized when  $H_b(\mathbf{r}_c) < 0$ , therefore, interactions exhibit the covalent nature in this region, whereas they exhibit no covalency if  $H_b(\mathbf{r}_c) > 0$ , due to the destabilization of electrons at BCPs under the conditions.<sup>SA1</sup> Eqn (SA2) represents the relation between  $\nabla^2\rho_b(\mathbf{r}_c)$  and  $H_b(\mathbf{r}_c)$ , together with  $G_b(\mathbf{r}_c)$  and  $V_b(\mathbf{r}_c)$ , which is closely related to the virial theorem.

$$H_b(\mathbf{r}_c) = G_b(\mathbf{r}_c) + V_b(\mathbf{r}_c) \quad (\text{SA1})$$

$$(\hbar^2/8m)\nabla^2\rho_b(\mathbf{r}_c) = H_b(\mathbf{r}_c) - V_b(\mathbf{r}_c)/2 \quad (\text{SA2})$$

$$= G_b(\mathbf{r}_c) + V_b(\mathbf{r}_c)/2 \quad (\text{SA2}')$$

Interactions are classified by the signs of  $\nabla^2\rho_b(\mathbf{r}_c)$  and  $H_b(\mathbf{r}_c)$ . Interactions in the region of  $\nabla^2\rho_b(\mathbf{r}_c) < 0$  are called shared-shell (SS) interactions and they are closed-shell (CS) interactions for  $\nabla^2\rho_b(\mathbf{r}_c) > 0$ .  $H_b(\mathbf{r}_c)$  must be negative when  $\nabla^2\rho_b(\mathbf{r}_c) < 0$ , since  $H_b(\mathbf{r}_c)$  are larger than  $(\hbar^2/8m)\nabla^2\rho_b(\mathbf{r}_c)$  by  $V_b(\mathbf{r}_c)/2$  with negative  $V_b(\mathbf{r}_c)$  at all BCPs (eqn (SA2)). Consequently,  $\nabla^2\rho_b(\mathbf{r}_c) < 0$  and  $H_b(\mathbf{r}_c) < 0$  for the SS interactions. The CS interactions are especially called *pure* CS interactions for  $H_b(\mathbf{r}_c) > 0$  and  $\nabla^2\rho_b(\mathbf{r}_c) > 0$ , since electrons at BCPs are depleted and destabilized under the conditions.<sup>SA1a</sup> Electrons in the intermediate region between SS and *pure* CS, which belong to CS, are locally depleted but stabilized at BCPs, since  $\nabla^2\rho_b(\mathbf{r}_c) > 0$  but  $H_b(\mathbf{r}_c) < 0$ .<sup>SA1a</sup> We call the interactions in this region *regular* CS,<sup>SA4,SA5</sup> when it is necessary to distinguish from *pure* CS. The role of  $\nabla^2\rho_b(\mathbf{r}_c)$  in the classification can be replaced by  $H_b(\mathbf{r}_c) - V_b(\mathbf{r}_c)/2$ , since  $(\hbar^2/8m)\nabla^2\rho_b(\mathbf{r}_c) = H_b(\mathbf{r}_c) - V_b(\mathbf{r}_c)/2$  (eqn (SA2)). Scheme SA1 summarizes the classification.

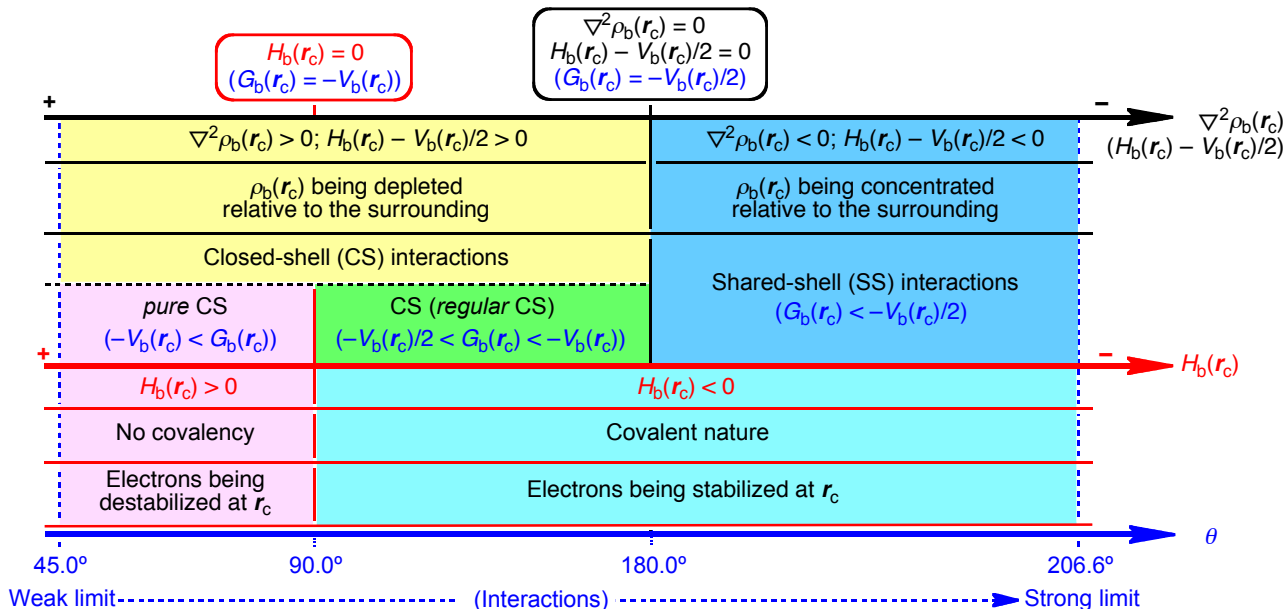

**Scheme SA1.** Classification of interactions by the signs of  $\nabla^2 \rho_b(r_c)$  and  $H_b(r_c)$ , together with  $G_b(r_c)$  and  $V_b(r_c)$ .

We proposed QTAIM-DFA by plotting  $H_b(r_c)$  versus  $H_b(r_c) - V_b(r_c)/2 (= (\hbar^2/8m)\nabla^2 \rho_b(r_c))$ ,<sup>SA4a</sup> after the proposal of  $H_b(r_c)$  versus  $\nabla^2 \rho_b(r_c)$ .<sup>SA4b</sup> Both axes in the plot of the former are given in energy unit, therefore, distances on the  $(x, y) (= (H_b(r_c) - V_b(r_c)/2, H_b(r_c)))$  plane can be expressed in the energy unit, which provides an analytical development. QTAIM-DFA incorporates the classification of interactions by the signs of  $\nabla^2 \rho_b(r_c)$  and  $H_b(r_c)$ . Scheme SA2 summarizes the QTAIM-DFA treatment. Interactions of *pure* CS appear in the first quadrant, those of *regular* CS in the fourth quadrant and SS interactions do in the third quadrant. No interactions appear in the second one.

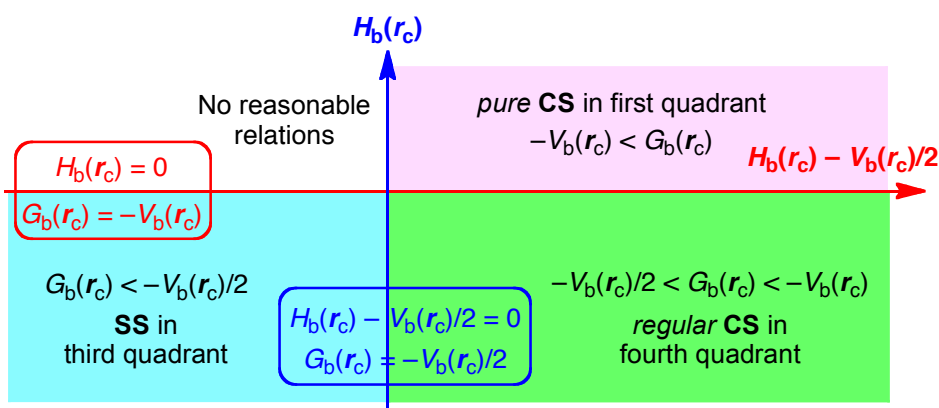

**Scheme SA2.** QTAIM-DFA: Plot of  $H_b(r_c)$  versus  $H_b(r_c) - V_b(r_c)/2$  for Weak to Strong Interactions.

In our treatment, data for perturbed structures around fully optimized structures are also employed for the plots, together with the fully optimized ones (see Fig. SA1).<sup>SA4-SA8</sup> We proposed the concept of the "dynamic nature of interaction" originated from the perturbed structures. The behavior of interactions at the fully optimized structures corresponds to "the static nature of interactions", whereas that containing perturbed structures exhibit the "dynamic nature of interaction" as explained below. The method to generate the perturbed structures is discussed later. Plots of  $H_b(r_c)$  versus  $H_b(r_c) - V_b(r_c)/2$  are analyzed

employing the polar coordinate  $(R, \theta)$  representation with  $(\theta_p, \kappa_p)$  parameters.<sup>SA4a,SA5-SA8</sup> Fig. SA1 explains the treatment.  $R$  in  $(R, \theta)$  is defined by eqn (SA3) and given in the energy unit. Indeed,  $R$  does not correspond to the usual interaction energy, but it does to the local energy at BCP, expressed by  $[(H_b(\mathbf{r}_c))^2 + (H_b(\mathbf{r}_c) - V_b(\mathbf{r}_c)/2)^2]^{1/2}$  in the plot (cf: eqn (SA3)), where  $R = 0$  for the enough large interaction distance. The plots show a spiral stream, as a whole.  $\theta$  in  $(R, \theta)$  defined by eqn (SA4), measured from the  $y$ -axis, controls the spiral stream of the plot. Each plot for an interaction shows a specific curve, which provides important information of the interaction (see Fig. SA1). The curve is expressed by  $\theta_p$  and  $\kappa_p$ . While  $\theta_p$ , defined by eqn (SA5) and measured from the  $y$ -direction, corresponds to the tangent line of a plot, where  $\theta_p$  is calculated employing data of the perturbed structures with a fully-optimized structure and  $\kappa_p$  is the curvature of the plot (eqn (SA6)). While  $(R, \theta)$  correspond to the static nature,  $(\theta_p, \kappa_p)$  represent the dynamic nature of interactions. We call  $(R, \theta)$  and  $(\theta_p, \kappa_p)$  QTAIM-DFA parameters, whereas  $\rho_b(\mathbf{r}_c)$ ,  $\nabla^2 \rho_b(\mathbf{r}_c)$ ,  $G_b(\mathbf{r}_c)$ ,  $V_b(\mathbf{r}_c)$ ,  $H_b(\mathbf{r}_c)$  and  $H_b(\mathbf{r}_c) - V_b(\mathbf{r}_c)/2$  belong to QTAIM functions.  $k_b(\mathbf{r}_c)$ , defined by eqn (SA7), is an QTAIM function but it will be treated as if it were an QTAIM-DFA parameter, if suitable.

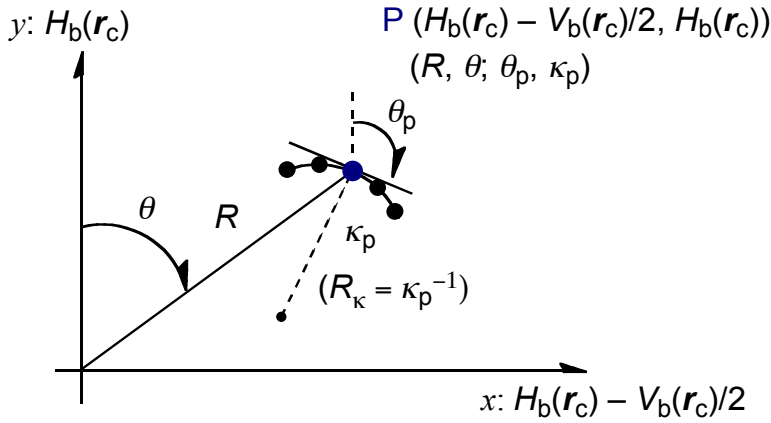

**Fig. SA1** Polar  $(R, \theta)$  coordinate representation of  $H_b(\mathbf{r}_c)$  versus  $H_b(\mathbf{r}_c) - V_b(\mathbf{r}_c)/2$ , with  $(\theta_p, \kappa_p)$  parameters.

$$R = (x^2 + y^2)^{1/2} \quad (\text{SA3})$$

$$\theta = 90^\circ - \tan^{-1}(y/x) \quad (\text{SA4})$$

$$\theta_p = 90^\circ - \tan^{-1}(dy/dx) \quad (\text{SA5})$$

$$\kappa_p = |d^2y/dx^2| / [1 + (dy/dx)^2]^{3/2} \quad (\text{SA6})$$

$$k_b(\mathbf{r}_c) = V_b(\mathbf{r}_c)/G_b(\mathbf{r}_c) \quad (\text{SA7})$$

where  $(x, y) = (H_b(\mathbf{r}_c) - V_b(\mathbf{r}_c)/2, H_b(\mathbf{r}_c))$

## Criteria for Classification of Interactions: Behavior of Typical Interactions Elucidated by QTAIM-DFA

$H_b(r_c)$  are plotted versus  $H_b(r_c) - V_b(r_c)/2$  for typical interactions in vdW (van der Waals interactions), HBs (hydrogen bonds), CT-MCs (molecular complexes through charge transfer),  $X_3^-$  (trihalide ions), CT-TBPs (trigonal bipyramidal adducts through charge-transfer), Cov-w (weak covalent bonds) and Cov-s (strong covalent bonds).<sup>SA4-SA8</sup> Rough criteria are obtained by applying QTAIM-DFA, after the analysis of the plots for the typical interactions according to eqns (SA3)–(SA7). Scheme SA3 shows the rough criteria, which are accomplished by the  $\theta$  and  $\theta_p$  values, together with the values of  $k_b(r_c)$ . The criteria will be employed to discuss the nature of interactions in question, as a reference.

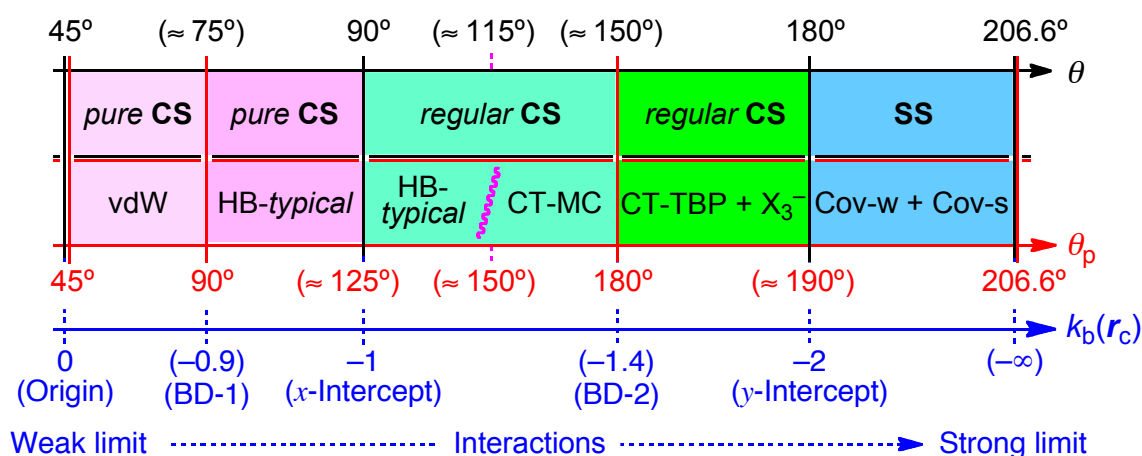

**Scheme SA3.** Rough classification and characterization of interactions by  $\theta$  and  $\theta_p$ , together with  $k_b(r_c)$  ( $= V_b(r_c)/G_b(r_c)$ ).

### Characterization of interactions

The characterization of interactions is explained employing  $[^1\text{Cl}^-2\text{Cl}^-3\text{Cl}^-]$ . The wide range of the perturbed structures were generated by partially optimizing  $r(^2\text{Cl}^-3\text{Cl}^-)$  in  $[^1\text{Cl}^-2\text{Cl}^-3\text{Cl}^-]$ , assuming the  $C_{\infty v}$  symmetry, with  $r(^1\text{Cl}^-2\text{Cl}^-)$  being fixed in the wide range. The partial optimization method is called POM.<sup>SA4b,SA5</sup> The QTAIM functions, such as  $V_b(r_c)$ ,  $G_b(r_c)$ ,  $H_b(r_c)$ ,  $H_b(r_c) - V_b(r_c)/2$  are calculated at BCPs for the wide varieties of the perturbed structures of  $[^1\text{Cl}^-2\text{Cl}^-3\text{Cl}^-]$ .  $H_b(r_c) - V_b(r_c)/2$  and  $H_b(r_c)$  are plotted versus the interaction distances  $r(^1\text{Cl}^-2\text{Cl}^-)$  in the perturbed structures of  $[^1\text{Cl}^-2\text{Cl}^-3\text{Cl}^-]$ , in the wide range. Fig. SA2 shows the plots. Each plot is analyzed using a regression curve of the ninth function and the first derivative of each regression curve is obtained. As shown in Fig. SA2, the maximum value of  $H_b(r_c)$  ( $d(H_b(r_c))/dr = 0$ ) is defined as the borderline between vdW and t-HB interactions. Similarly, the maximum value of  $H_b(r_c) - V_b(r_c)/2$  ( $d(H_b(r_c) - V_b(r_c)/2)/dr = 0$ ) does to the borderline between CT-MC and CT-TBP. However, it seems difficult to find a characteristic point corresponding to the borderline between t-HB and CT-MC in nature. Therefore, the borderline is tentatively given by  $\theta_p = 150^\circ$  based on the expectation from the experimental results, where  $\theta_p$  is defined by  $[90^\circ - \tan^{-1}[dH_b(r_c)/d(H_b(r_c) - V_b(r_c)/2)]]$  in the plot of  $H_b(r_c)$  versus  $H_b(r_c) - V_b(r_c)/2$ . The proposed classification and characterization of interactions, by means of the QTAIM functions of  $H_b(r_c)$ ,  $H_b(r_c) - V_b(r_c)/2$ ,  $G_b(r_c)$  and/or  $V_b(r_c)$ , are summarized in Table SA1. The plot of  $H_b(r_c) - V_b(r_c)/2$  versus  $w$  in Fig. SA2 is essentially the same as that of  $\nabla^2\rho_b(r_c)$  versus  $d(\text{H}---\text{F})$  in  $\text{X}-\text{H}---\text{F}-\text{Y}$ , presented by Espinosa and co-workers.<sup>SA9</sup>

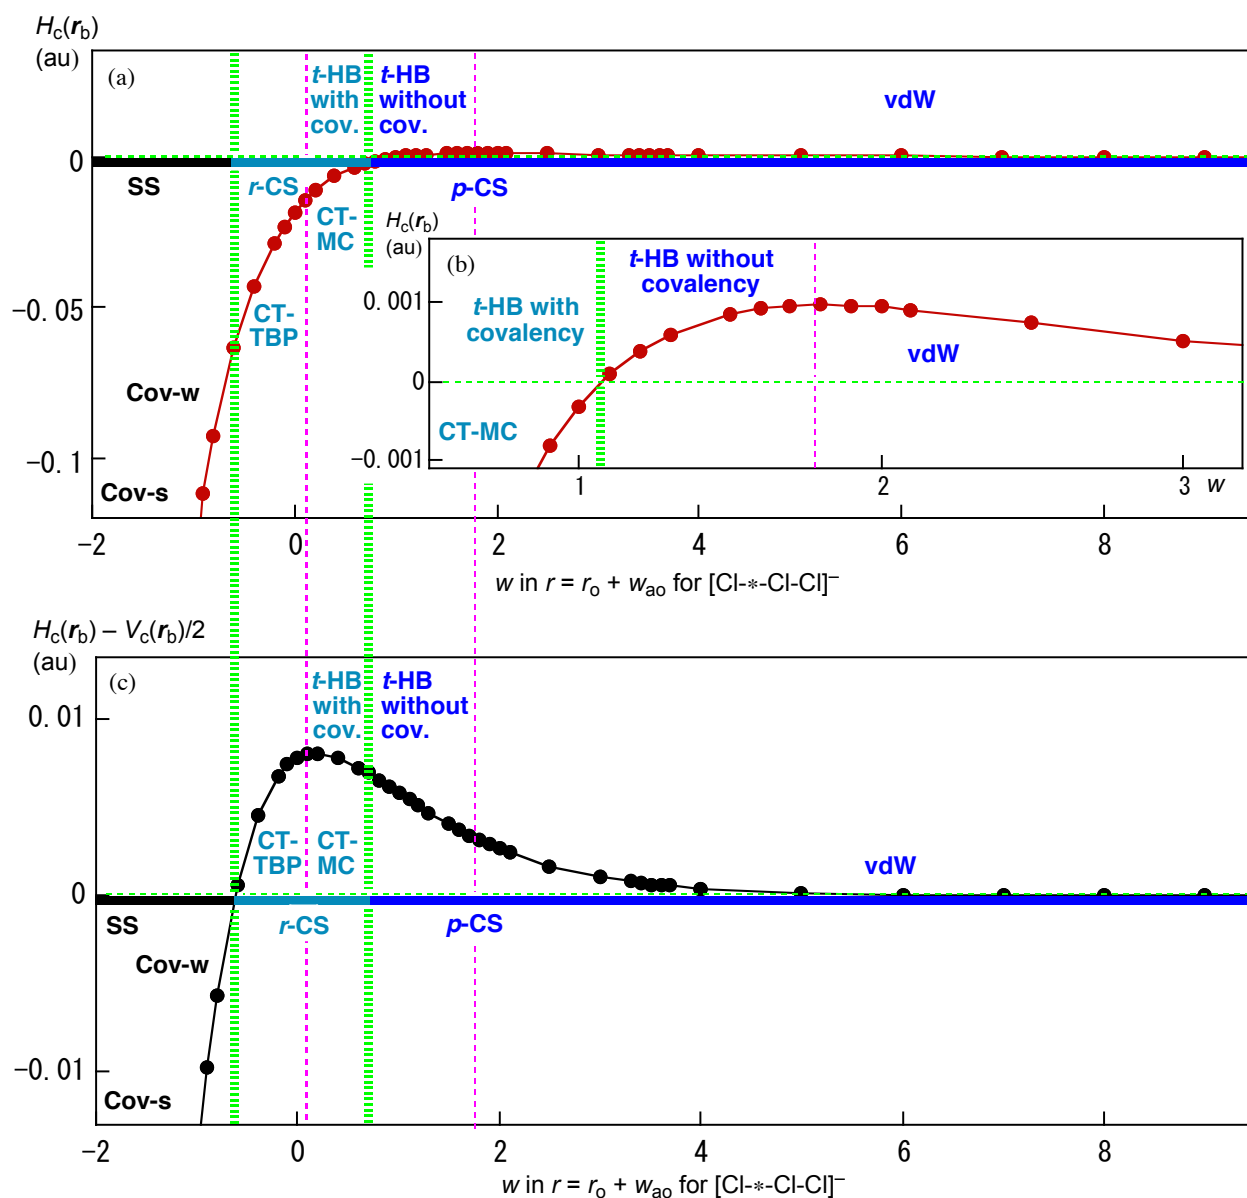

**Fig. SA2** Plot of  $H_b(r_c)$  versus  $w$  in  $r({}^1\text{Cl}-{}^2\text{Cl}) = r_o({}^1\text{Cl}-{}^2\text{Cl}) + wa_o$  for  ${}^1\text{Cl}-{}^2\text{Cl}-{}^3\text{Cl}^-$  (a) with the magnified picture of (a) (b) and that of  $H_b(r_c) - V_b(r_c)/2$  versus  $w$  (c). Typical hydrogen bonds without covalency and typical hydrogen bonds with covalency are abbreviated as  $t$ -HB without cov. and  $t$ -HB with cov., respectively, whereas Cov-w and Cov-s stand for weak covalent bonds and strong covalent bonds, respectively.

**Table SA1.** Proposed definitions for the classification and characterization of interactions by the signs  $H_b(\mathbf{r}_c)$  and  $H_b(\mathbf{r}_c) - V_b(\mathbf{r}_c)/2$  and their first derivatives, together with the tentatively proposed definitions by the characteristic points on the plots of  $H_b(\mathbf{r}_c)$  versus  $H_b(\mathbf{r}_c) - V_b(\mathbf{r}_c)/2$ . The tentatively proposed definitions are shown by italic. The requirements for the interactions are also shown.

| ChP/Interaction                           | Requirements by $H_b(\mathbf{r}_c)$ and $V_b(\mathbf{r}_c)$                                                                      | Requirements by $G_b(\mathbf{r}_c)$ and $V_b(\mathbf{r}_c)$                                                                  |
|-------------------------------------------|----------------------------------------------------------------------------------------------------------------------------------|------------------------------------------------------------------------------------------------------------------------------|
| Origin                                    | $H_b(\mathbf{r}_c) - V_b(\mathbf{r}_c)/2 = 0; H_b(\mathbf{r}_c) = 0$                                                             | $G_b(\mathbf{r}_c) = 0; V_b(\mathbf{r}_c) = 0$                                                                               |
| vdW                                       | $H_b(\mathbf{r}_c) > 0; dH_b(\mathbf{r}_c)/d(-r) > 0$                                                                            | $G_b(\mathbf{r}_c) > -V_b(\mathbf{r}_c); dG_b(\mathbf{r}_c)/d(-r) > -dV_b(\mathbf{r}_c)/d(-r)$                               |
| Borderline (BD-1)                         | $H_b(\mathbf{r}_c) > 0; dH_b(\mathbf{r}_c)/d(-r) = 0$                                                                            | $G_b(\mathbf{r}_c) > -V_b(\mathbf{r}_c); dG_b(\mathbf{r}_c)/d(-r) = -dV_b(\mathbf{r}_c)/d(-r)$                               |
| <i>t</i> -HB <sub>with no covalency</sub> | $H_b(\mathbf{r}_c) > 0; dH_b(\mathbf{r}_c)/d(-r) < 0$                                                                            | $G_b(\mathbf{r}_c) > -V_b(\mathbf{r}_c); dG_b(\mathbf{r}_c) < -dV_b(\mathbf{r}_c)$                                           |
| Borderline ( <i>x</i> -intercept)         | $H_b(\mathbf{r}_c) = 0$ ( $\theta_p^a = 125^\circ$ )                                                                             | $G_b(\mathbf{r}_c) = -V_b(\mathbf{r}_c)$ ( $\theta_p^a = 125^\circ$ )                                                        |
| <i>t</i> -HB <sub>with covalency</sub>    | $H_b(\mathbf{r}_c) < 0; (125^\circ <) \theta_p^a < 150^\circ$                                                                    | $G_b(\mathbf{r}_c) < -V_b(\mathbf{r}_c); (125^\circ <) \theta_p^b < 150^\circ$                                               |
| <i>Borderline (Tentative)</i>             | $\theta_p^a = 150^\circ$                                                                                                         | $\theta_p^b = 150^\circ$                                                                                                     |
| CT-MC                                     | $d(H_b(\mathbf{r}_c) - V_b(\mathbf{r}_c)/2)/d(-r) > 0;$<br>$150^\circ < \theta_p^a < 180^\circ$                                  | $dG_b(\mathbf{r}_c) > dV_b(\mathbf{r}_c)/2;$<br>$150^\circ < \theta_p^a < 180^\circ$                                         |
| Borderline (BD-2)                         | $d(H_b(\mathbf{r}_c) - V_b(\mathbf{r}_c)/2)/d(-r) = 0$<br>$(H_b(\mathbf{r}_c) - V_b(\mathbf{r}_c)/2 > 0; H_b(\mathbf{r}_c) < 0)$ | $2dG_b(\mathbf{r}_c)/d(-r) = -dV_b(\mathbf{r}_c)/d(-r)$<br>$(-V_b(\mathbf{r}_c)/2 < G_b(\mathbf{r}_c) < -V_b(\mathbf{r}_c))$ |
| CT-TBP with $X_3^-$                       | $d(H_b(\mathbf{r}_c) - V_b(\mathbf{r}_c)/2)/d(-r) < 0$<br>$(H_b(\mathbf{r}_c) - V_b(\mathbf{r}_c)/2 > 0; H_b(\mathbf{r}_c) < 0)$ | $2dG_b(\mathbf{r}_c)/d(-r) < -dV_b(\mathbf{r}_c)/d(-r)$<br>$(-V_b(\mathbf{r}_c)/2 < G_b(\mathbf{r}_c) < -V_b(\mathbf{r}_c))$ |
| Borderline ( <i>y</i> -intercept)         | $H_b(\mathbf{r}_c) - V_b(\mathbf{r}_c)/2 = 0$ ( $H_b(\mathbf{r}_c) < 0$ )                                                        | $G_b(\mathbf{r}_c) = -V_b(\mathbf{r}_c)/2$ ( $G_b(\mathbf{r}_c) < -V_b(\mathbf{r}_c)$ )                                      |
| Cov-w                                     | $H_b(\mathbf{r}_c) - V_b(\mathbf{r}_c)/2 < 0; R^c < 0.15 \text{ au}$                                                             | $G_b(\mathbf{r}_c) < -V_b(\mathbf{r}_c)/2; R^c < 0.15 \text{ au}$                                                            |
| <i>Borderline (Tentative)</i>             | $R^c = 0.15 \text{ au}$                                                                                                          | $R^d = 0.15 \text{ au}$                                                                                                      |
| Cov-s                                     | $H_b(\mathbf{r}_c) - V_b(\mathbf{r}_c)/2 < 0; R^c > 0.15 \text{ au}$                                                             | $G_b(\mathbf{r}_c) < -V_b(\mathbf{r}_c)/2; R^d > 0.15 \text{ au}$                                                            |

<sup>a</sup>  $\theta_p = 90^\circ - \tan^{-1} [dH_b(\mathbf{r}_c)/d(H_b(\mathbf{r}_c) - V_b(\mathbf{r}_c)/2)]$ ,  $\theta_p = 125^\circ$  is tentatively given for  $\theta = 90^\circ$ , where  $\theta$  is defined by  $90^\circ - \tan^{-1}[H_b(\mathbf{r}_c)/(H_b(\mathbf{r}_c) - V_b(\mathbf{r}_c)/2)]$  with  $H_b(\mathbf{r}_c) = 0$ . <sup>b</sup>  $\theta_p = 90^\circ - \tan^{-1}[d(G_b(\mathbf{r}_c) + V_b(\mathbf{r}_c))/d(G_b(\mathbf{r}_c) + V_b(\mathbf{r}_c)/2)]$ ,  $\theta_p = 125^\circ$  is tentatively given for  $\theta = 90^\circ$ , where  $\theta$  is defined by  $90^\circ - \tan^{-1}[(G_b(\mathbf{r}_c) + V_b(\mathbf{r}_c))/(G_b(\mathbf{r}_c) + V_b(\mathbf{r}_c)/2)]$  with  $(G_b(\mathbf{r}_c) + V_b(\mathbf{r}_c)) = 0$ . <sup>c</sup>  $R = [(H_b(\mathbf{r}_c) - V_b(\mathbf{r}_c)/2)^2 + (H_b(\mathbf{r}_c))^2]^{1/2}$ . <sup>d</sup>  $R = [(G_b(\mathbf{r}_c) + V_b(\mathbf{r}_c)/2)^2 + (G_b(\mathbf{r}_c) + V_b(\mathbf{r}_c))^2]^{1/2}$ .

## References

- SA1 (a) *Atoms in Molecules. A Quantum Theory*: eds. R. F. W. Bader, Oxford University Press, Oxford, UK, 1990; (b) C. F. Matta, R. J. Boyd, *An Introduction to the Quantum Theory of Atoms in Molecules in The Quantum Theory of Atoms in Molecules: From Solid State to DNA and Drug Design*: eds. C. F. Matta, R. J. Boyd, WILEY-VCH, Weinheim, Germany, 2007, Chapter 1.
- SA2 (a) R. F. W. Bader, T. S. Slee, D. Cremer, E. Kraka, *J. Am. Chem. Soc.* **1983**, *105*, 5061–5068; (b) R. F. W. Bader, *Chem. Rev.* **1991**, *91*, 893–926; (c) R. F. W. Bader, *J. Phys. Chem. A* **1998**, *102*, 7314–7323; (d) F. Biegler-König, R. F. W. Bader, T. H. Tang, *J. Comput. Chem.* **1982**, *3*, 317–328; (e) R. F. W. Bader, *Acc. Chem. Res.* **1985**, *18*, 9–15; (f) T. H. Tang, R. F. W. Bader, P. MacDougall, *Inorg. Chem.* **1985**, *24*, 2047–2053; (g) F. Biegler-König, J. Schönbohm, D. Bayles, *J. Comput. Chem.* **2001**, *22*, 545–559; (h) F. Biegler-König, J. Schönbohm, *J. Comput. Chem.* **2002**, *23*, 1489–1494.
- SA3 W. Nakanishi, T. Nakamoto, S. Hayashi, T. Sasamori, N. Tokitoh, *Chem. Eur. J.* **2007**, *13*, 255–268.
- SA4 (a) W. Nakanishi, S. Hayashi, K. Narahara, *J. Phys. Chem. A* **2009**, *113*, 10050–10057; (b) W. Nakanishi, S. Hayashi, K. Narahara, *J. Phys. Chem. A* **2008**, *112*, 13593–13599.
- SA5 W. Nakanishi, S. Hayashi, *Curr. Org. Chem.* **2010**, *14*, 181–197.
- SA6 (a) W. Nakanishi, S. Hayashi, *J. Phys. Chem. A* **2010**, *114*, 7423–7430; (b) W. Nakanishi, S. Hayashi, K. Matsuiwa, M. Kitamoto, *Bull. Chem. Soc. Jpn* **2012**, *85*, 1293–1305.
- SA7 W. Grimme, J. Wortmann, D. Frowein, J. Lex, G. Chen, R. Gleiter, *J. Chem. Soc., Perkin Trans. 2* **1998**, 1893–1900.
- SA8 C.-T. Lin, N.-J. Wang, Y.-L. Yeh, T.-C. Chou, *Tetrahedron*, **1995**, *51*, 2907–2928.
- SA9 E. Espinosa, I. Alkorta, J. Elguero, E. Molins, *J. Chem. Phys.* **2002**, *117*, 5529. See also R. Bianchi, G. Gervasio and D. Marabello, *C. R. Chim.*, 2005, **8**, 1392.
